1 **Short title:** Momilactone B acts via ABA and auxin signaling

2 **Article title:** Momilactone B inhibits Arabidopsis growth and

3 development via disruption of ABA and auxin signaling

4 Jianxin Wu<sup>1,2,3</sup>, Jun Long<sup>1</sup>, Xianhui Lin<sup>1</sup>, Zhenyi Chang<sup>3</sup>, Scott R. Baerson<sup>4</sup>, Chaohui  
5 Ding<sup>1</sup>, Xiaoyan Wu<sup>1</sup>, Zhiqiang Pan<sup>4</sup>, Yuanyuan Song<sup>1\*</sup>, Rensen Zeng<sup>1\*</sup>

6

7 <sup>1</sup> Key Laboratory of Ministry of Education for Genetics, Breeding and Multiple  
8 Utilization of Crops, College of Agriculture, Fujian Agriculture and Forestry University,  
9 Fuzhou, 350002, China

10 <sup>2</sup> College of Life Sciences, Fujian Agriculture and Forestry University, Fuzhou, 350002,  
11 China

12 <sup>3</sup> Guangdong Provincial Key Laboratory of Biotechnology for Plant Development,  
13 School of Life Sciences, South China Normal University, Guangzhou 510631, China

14 <sup>4</sup> United States Department of Agriculture-Agricultural Research Service, Natural  
15 Products Utilization Research Unit, University, Mississippi 38677, USA

16

17 \* **Authors for Correspondence:** Email: [yyuansong@fafu.edu.cn](mailto:yyuansong@fafu.edu.cn) (Y.S.) and  
18 [rszeng@fafu.edu.cn](mailto:rszeng@fafu.edu.cn) (R.Z.). Telephone, 86-188-5010-5200, 86-591-8378-9272

19

20 **One-sentence summary:**

21 Momilactone B, the key allelochemical of rice, inhibits Arabidopsis growth and  
22 development via disruption of ABA and auxin signaling, suggesting the crucial roles  
23 of phytohormones in plant allelopathy

24 **Footnotes:**

25

26 **Author contributions**

27 J.W., Y.S. and R.Z. conceived and designed the experiments, J.W., J.L., Z.C., X.L.  
28 and X.W. performed the experiments, J.W., J.L., Y.S., S.B. and Z.P. analyzed the  
29 data, J.W., Y.S., S.B. and R.Z. wrote the manuscript.

30

31 **Funding information:** This research was supported by the National Natural Science  
32 Foundation of China (31670414, 31870361), Natural Science Foundation of Fujian  
33 Province (2017J01427), Educational Research Program for Young and Middle-aged  
34 Teachers of Fujian province (JAT160154), and Guangzhou Science and Technology  
35 Innovation Commission (201804010034).

36

37

38 **Abstract**

39 In competition for limited resources, many plants release allelochemicals to inhibit the  
40 growth of neighboring plants. Momilactone B (MB) is a major allelochemical produced  
41 by rice (*Oryza sativa*), however its mode of action is currently unknown. We used  
42 *Arabidopsis* (*Arabidopsis thaliana*) as a model system to evaluate potential  
43 mechanisms underlying the inhibitory effects of MB on seed germination, seedling  
44 establishment and root growth through the use of confocal microscopy and the  
45 examination of transcriptional responses in MB-treated seedlings. In response to MB  
46 treatment, transcript levels for genes encoding several key ABA biosynthetic enzymes  
47 and signaling components, including the transcription factor ABA-INSENSITIVE 4  
48 (ABI4), were dramatically increased. Additionally, *ABA insensitive 4 (abi4)* mutant  
49 seedlings exhibited reduced susceptibility to exogenously-provided MB. Although the  
50 transcript levels of *DELLA* genes, which negatively regulate GA signaling, were  
51 significantly increased upon MB exposure, exogenous GA application did not reverse  
52 the inhibitory effects of MB on *Arabidopsis* germination and seedling development.  
53 Moreover, a reduction in seedling root meristematic activity, associated with reduced  
54 expression of auxin biosynthetic genes and efflux transporters, and apparent lowered  
55 auxin content, was observed in MB-treated root tips. Exogenous auxin applications  
56 partially rescued the inhibitory effects of MB observed in root growth. Our results  
57 indicate that MB suppresses *Arabidopsis* seed germination and root growth primarily  
58 via disruption of ABA and auxin signaling. These findings underscore the crucial roles  
59 played by phytohormones in mediating responses to allelochemical exposure.

60

61 **Key Words:** Momilactone B, allelopathy, mode of action, ABA signaling, auxin  
62 signaling, *Oryza sativa*, *Arabidopsis thaliana*

63

## 64 **Introduction**

65 To gain an advantage in the competition for limited light, water and nutrient resources,  
66 certain plants species inhibit the growth of neighboring plants through the release of  
67 chemical compounds. This phenomenon is termed allelopathy, and the inhibitory  
68 compounds released are referred to as allelochemicals (Macias *et al.*, 2007; Inderjit *et*  
69 *al.*, 2011). Allelochemicals released within the soil environment can inhibit diverse  
70 processes such as seed germination, cell elongation, cell division, nutrient acquisition  
71 and photosynthesis, and are thought to profoundly influence plant community structure  
72 and evolution through the loss of susceptible species via chemical interference, and by  
73 imposing selective pressure favoring more tolerant species (Bais *et al.*, 2003; Macias *et*  
74 *al.*, 2007). Allelopathic crop species and their residues can also be used as cost-effective  
75 weed management tools for sustainable agriculture systems which reduce the  
76 requirement for synthetic herbicide applications (Jabran *et al.*, 2015). An increased  
77 understanding of plant allelopathy will therefore not only improve our ability to devise  
78 effective approaches for limiting the spread of invasive weeds and preserving native  
79 plant stands, but could also lead to the development of more sustainable weed  
80 management practices.

81 Rice (*Oryza sativa* L.) represents one of the world's most important food crops,  
82 therefore yield losses due to weed infestations in rice cropping systems result in  
83 substantial economic costs worldwide (Siddique & Ismail, 2013). Currently, the most  
84 well-established and effective weed control options available for rice involve synthetic  
85 herbicide spray applications, however the extensive use of synthetic herbicides and  
86 other chemical pesticides in agricultural systems poses significant risks to both the  
87 environment and human health (Neve *et al.*, 2009). Allelopathic crop varieties have  
88 therefore generated significant interest for the development of alternative,  
89 environmentally sound weed control methods, and in a study performed by Dilday and  
90 coworkers more than 5000 rice varieties were screened, resulting in the identification  
91 of 191 rice varieties exhibiting significant allelopathic activity (Dilday *et al.*, 1994).  
92 Significant efforts have also been made to introduce allelopathic traits into cultivated

93 rice varieties and to identify all of the active allelochemicals produced by rice plants.  
94 The putative allelochemicals identified from rice to date include alkaloids, phenolics,  
95 flavonoids, glucosinolates and terpenoids (Kato-Noguchi *et al.*, 2002; Seal *et al.*, 2004a;  
96 Seal *et al.*, 2004b). Seal *et al.* (2004b) isolated and identified twenty-five compounds  
97 from the root exudates of both allelopathic and non-allelopathic rice varieties.  
98 Interestingly, the contents of five phenolics, including caffeic acid, *p*-hydroxybenzoic  
99 acid, vanillic acid, syringic acid, and *p*-coumaric acid, were determined to be  
100 significantly higher in allelopathic rice varieties, however, the concentrations of these  
101 putative allelochemicals in rice root exudates and soils were much lower than what is  
102 thought to be required for the effective growth inhibition of weeds (Seal *et al.*, 2004a;  
103 Seal *et al.*, 2004b).

104 Momilactones A (MA) and B (MB) are highly active diterpene allelochemicals  
105 found in rice root exudates as well as hulls, and are among the most extensively studied  
106 (Kato *et al.*, 1973; Takahashi *et al.*, 1976; Kato-Noguchi *et al.*, 2002, 2008). Both  
107 compounds exert strong inhibitory effects on the growth of susceptible species,  
108 although MB exhibits significantly higher activity than MA (Kato-Noguchi *et al.*, 2010).  
109 For example, the IC<sub>50</sub> values (concentration required for 50% growth inhibition)  
110 determined for barnyard grass (*Echinochloa crus-galli*) seedling shoot and root tissues  
111 were 146 and 91 μM for MA, and 6.5 and 6.9 μM for MB, respectively (Kato-Noguchi  
112 *et al.*, 2010). Although the overall content of MB in rice plants is less than that of MA,  
113 higher levels of MB are exuded by rice seedling root systems. Taking the relative  
114 activities of the two compounds into consideration, it has been estimated that MA  
115 accounts for only 0.8–2.2% of the observed growth inhibition of *E. crus-galli* by rice,  
116 whereas MB accounts for 59–82% of the observed growth inhibition, suggesting a  
117 major role for MB in the allelopathic potential of rice plants (Kato-Noguchi *et al.*, 2010).  
118 Furthermore, RNAi-mediated inhibition of key momilactone biosynthetic genes such  
119 as copalyl diphosphate synthase 4 (*OsCPS4*) and kaurene synthase-like 4 (*OsKSL4*),  
120 resulted in significant reductions in momilactone release and reduced allelopathic  
121 activity of rice seedlings in *in vitro* assays, and similarly, over-expression of *OsCPS2*

122 and *OsCPS4* significantly increased allelopathic potential *in vitro* (Xu *et al.*, 2012; Niu  
123 *et al.*, 2017). Taken together, these studies clearly demonstrate the key role played by  
124 momilactones in rice allelopathy, and particularly that of MB.

125 Although numerous studies have been conducted to date which document the  
126 physiological effects of momilactones on susceptible plant species, and/or address the  
127 ecophysiological roles they may play, a relative paucity of information exists  
128 concerning the mode of action of these compounds. In one study performed by Kato-  
129 Noguchi and coworkers (2013) examining the effects of MB on germinating  
130 *Arabidopsis* seedlings, a reduction of seed storage protein metabolism was observed.  
131 In their study, protein levels of subtilisin-like serine protease, amylin synthase LUP2,  
132  $\beta$ -glucosidase and malate synthase were significantly decreased, while those of  
133 glutathione S-transferase and l-cysteine peroxiredoxin 1 were increased, indicating that  
134 MB may affect *Arabidopsis* early seedling growth by inhibiting the mobilization of  
135 protein storage reserves (Kato - Noguchi *et al.*, 2013). Direct evidence linking MB to  
136 a specific cellular target or targets however is still lacking.

137 Given the limited genetic information available for *E. crus-galli* and other noxious  
138 weeds commonly associated with rice cultivation, we instead employed *Arabidopsis* as  
139 a model to further investigate the *in vivo* mechanism of MB action. In the present work,  
140 the effects of MB exposure on seed germination, seedling establishment and root  
141 development were evaluated, and the mechanism of MB-induced inhibition of these  
142 processes was investigated. Our results indicated that MB exposure inhibits seed  
143 germination in *Arabidopsis* primarily through the induction of both the biosynthesis of  
144 ABA as well as ABA-mediated signaling components. Consistent with this, ABA-  
145 insensitive *abi4* mutant seeds were observed to exhibit dramatically higher germination  
146 frequencies in the presence of MB relative to wild-type seeds. Additionally, MB  
147 appeared to inhibit seedling root system development via the disruption of auxin  
148 biosynthesis and the polar transport of auxins within root tips. Application of exogenous  
149 auxin was observed to partially reverse the inhibitory effects of MB on roots.

150 Collectively, our findings highlight the critical roles played by the phytohormones ABA  
151 and auxin in MB-mediated allelopathic inhibition.

## 152 **Results**

### 153 **MB inhibits germination and early seedling establishment**

154 The potential inhibitory effects of MB on Arabidopsis were first evaluated by  
155 comparing germination frequencies and cotyledon greening in the presence and absence  
156 of exogenously supplied MB (Fig. 1a-c). In the presence of 4  $\mu$ M MB, the average %  
157 germination observed was approximately 69% at 36 hours post-planting, whereas  
158 approximately 99% of the seeds placed on MB-free medium had germinated by the 36 h  
159 timepoint (Fig. 1a-b). Cotyledon greening, which represents a critical step for seedling  
160 establishment (Shu *et al.*, 2013), was also compared at 4 days post-planting for  
161 seedlings germinated in the presence or absence of MB. As was observed for  
162 germination frequencies, cotyledon greening was also significantly impaired by  
163 exposure to MB (Fig. 1a, c). Approximately 99% of the seedlings grown on MB-free  
164 medium had greened within the 4 day period, whereas seedlings grown on MB-  
165 supplemented medium exhibited no discernible greening within this time period. Thus,  
166 the results clearly demonstrate the dramatic inhibitory effects imposed by MB on  
167 Arabidopsis germination and early seedling establishment.

### 168 **Role for ABA in MB-mediated inhibition of germination and early seedling** 169 **establishment**

170 Several plant hormones are involved in controlling seed germination, and abscisic acid  
171 (ABA) and gibberellin acid (GA) play particularly prominent roles (Shu *et al.*, 2016).  
172 The antagonistic interaction between ABA and GA in this regard has been well  
173 documented, with ABA involved in the maintenance of seed dormancy and inhibition  
174 of germination, while GA breaks seed dormancy and induces cellular processes  
175 required during germination (Tuan *et al.*, 2018). To examine the potential roles played  
176 by ABA and GA in the inhibition of seed germination by MB, we first analyzed

177 transcript levels of selected genes involved in ABA and GA biosynthesis and signaling  
178 in Arabidopsis seedlings germinated in the presence and absence of 4  $\mu$ M MB (Fig. 2).  
179 The transcript levels for *NCED3*, *NCED6* and *NCED9*, which encode rate-limiting  
180 enzymes within the ABA biosynthetic pathway, were dramatically increased in MB-  
181 treated seedlings relative to untreated control seedlings (Fig. 2a). The ABA-responsive  
182 transcription factors *ABI3*, *ABI4* and *ABI5* positively regulate ABA signaling during  
183 seed development and germination. Loss of function of *ABI3*, *ABI4* or *ABI5* releases  
184 the inhibitory effect of ABA on seed germination (Finkelstein, 2013). *EM1* and *EM6*  
185 encode proteins associated with embryogenesis, and can be reactivated by exogenous  
186 ABA application during seed germination (Hu *et al.*, 2019). *RD29A* is a typical ABA-  
187 responsive marker gene (Nakashima *et al.*, 2006). The levels of *ABI3*, *ABI4*, *ABI5*, *EM1*,  
188 *EM6* and *RD29A* transcripts were also markedly increased in MB-treated seedlings  
189 relative to controls (Fig. 2c-d). In the case of *ABI4*, the observed transcript level  
190 increase was more than one thousand-fold (Fig. 2c), indicating that *ABI4* could play a  
191 significant role in the MB-associated inhibition of seed germination.

192 To further examine the potential involvement of *ABI4* in the inhibitory effects of MB,  
193 Arabidopsis *abi4* mutant seedlings were germinated in the presence of 0, 2, or 4  $\mu$ M  
194 MB and compared with identically-treated wild-type seedlings (Fig. 3). The observed  
195 germination and cotyledon greening frequencies of *abi4* mutant plants were similar to  
196 WT(*At*) plants on medium lacking MB. In both the 2  $\mu$ M and 4  $\mu$ M MB treatments,  
197 the % germination and cotyledon greening of *abi4* mutant seedlings were significantly  
198 higher than those of WT plants, indicating that the *abi4* seedlings were more resistant  
199 to the inhibitory effects of MB (Fig. 3a-c).

200 Transcript levels of selected genes involved in GA biosynthesis and signaling were  
201 also analyzed in seedlings germinated in the presence and absence of 4  $\mu$ M MB (Fig.  
202 2). DELLA proteins are key negative regulators of the GA-GID1-DELLA signaling  
203 pathway and appear to repress all GA-promoted processes, including seed germination  
204 and seedling establishment (Sun, 2008). There are five genes encoding DELLA proteins  
205 in Arabidopsis, *RGAI*, *GAI*, *RGL1*, *RGL2* and *RGL3*. Our results revealed that



206 transcript levels of the represented DELLA genes, *RGAI*, *GAI*, *RGL2* and *RGL3* were  
207 highly up-regulated in MB-treated seedlings relative to untreated controls (Fig. 2e).  
208 Interestingly, the transcript levels of representative GA biosynthetic genes, which  
209 included *GA3*, *KAOI*, *GA20ox1*, *GA3ox1* and *GA2ox8*, were also increased in MB-  
210 treated seedlings (Fig. 2b), presumably via a feedback loop regulating this pathway  
211 (Middleton *et al.*, 2012). Given that the transcript levels of *DELLAs* were up-regulated  
212 by MB treatment, we performed additional experiments to determine whether co-  
213 application of exogenous GA could reverse the inhibitory effects on seed germination  
214 caused by MB exposure. WT seeds were germinated on half strength MS medium  
215 supplemented with either 2  $\mu$ M MB, 40  $\mu$ M GA or 2  $\mu$ M MB plus 40  $\mu$ M GA, as well  
216 as untreated controls (Fig. 4). At 1.5 day post-planting however, GA addition did not  
217 appear to reverse the inhibitory effects of MB, and in fact GA addition exacerbated the  
218 inhibition, leading to further decrease in % germination (25.3% for MB plus GA  
219 compared with 60.5% for MB treatment alone; Fig. 4a-b). Similar results were obtained  
220 for cotyledon greening when GA was co-applied with MB (Fig. 4a, c). At nine days  
221 post-planting, the % cotyledon greening was 4.4% in GA plus MB treated seedlings,  
222 whereas the observed frequency of greening was 96.4% for seedlings grown in the  
223 presence of MB alone. These results suggest that MB inhibits seed germination and  
224 seedling establishment, at least in part, by disrupting ABA biosynthesis and/or  
225 signaling, however the involvement of GA is unclear.

### 226 **Receiver seedling root systems are sensitive targets for inhibition by MB**

227 In rice, *syn*-copalyl diphosphate (*syn*-CDP) synthase (OsCPS4), is an essential enzyme  
228 in momilactone biosynthesis which catalyzes the formation of *syn*-copalyl diphosphate  
229 (*syn*-CPP) from the general diterpenoid precursor (E,E,E)-geranylgeranyl diphosphate  
230 (GGPP) (Xu *et al.*, 2012). To examine the role played by momilactones in the  
231 allelopathic potential of rice, an *oscps4* mutant was first created using the CRISPR-  
232 Cas9 genome editing method (Xie *et al.*, 2017). The resulting *oscps4* mutant contained  
233 a frameshift within the *OsCPS4* coding region, resulting from a single nucleotide  
234 deletion (Fig. S1a). *In vitro* allelopathic activity assays were then performed for both

235 wild-type and *oscps4* rice seedling donors against *Echinochloa crus-galli* (barnyard  
236 grass) seedlings, a noxious weed frequently found in cultivated rice fields (Khanh *et al.*,  
237 2007). As shown in Fig. 5a-c, deficiency in OsCPS4 reduced the allelopathic activity  
238 of rice against barnyard grass seedlings, leading to increased root lengths in the co-  
239 cultivated receiver plants, in comparison with the receiver plants co-cultivated with  
240 wild-type rice. Consistent with these observations, exogenously provided MB  
241 significantly inhibited the growth of barnyard grass seedling root systems at 1, 2 and 4  
242  $\mu\text{M}$  concentrations, whereas seedling shoot system development was relatively  
243 unaffected by these treatments (Fig. 5d-e). In addition, comparable results were  
244 obtained for pilot assays utilizing *Lactuca sativa* (lettuce) seedlings, a receiver species  
245 frequently employed to assess allelopathic activity (Fig. S1b-c). Collectively, the  
246 results from the allelopathic activity assay experiments both confirm the significant role  
247 played by momilactones in rice allelopathy.

#### 248 **MB affects Arabidopsis root patterning and primary root meristem maintenance**

249 To further investigate the effect of MB on Arabidopsis root development, 5-day-old  
250 seedlings of WT(*At*) were treated with either 0, 2 or 4  $\mu\text{M}$  of MB, and examined by  
251 both confocal and bright field microscopy (Fig. 6). Consistent with the observed effects  
252 of MB on barnyard grass (Fig. 5d-e), the growth of Arabidopsis primary roots were  
253 significantly inhibited by MB exposure (Fig. 6a, e). Moreover, MB exposure led to a  
254 significant reduction in the number of lateral roots produced relative to untreated  
255 seedlings, as well as a dramatic reduction in root hair formation (Fig. 6a, b, e, f).

256 Root growth is precisely controlled by cell division and cell differentiation, with  
257 the majority of mitotic activity occurring within the meristematic zone located at the  
258 distal end of roots (Petricka *et al.*, 2012). To characterize the growth pattern of MB-  
259 exposed roots in greater detail, the meristem size and the number of meristematic cortex  
260 cells were measured four days after MB treatment. Interestingly, both the meristem size  
261 and the number of cortex cells were reduced in MB-treated seedlings (Fig. 6c, g, h). In  
262 the 4  $\mu\text{M}$  MB-treated seedlings, root meristem lengths and cortical cell numbers were

263 reduced by approximately 70% and 78%, respectively, compared with untreated  
264 seedlings (Fig. 6c, g, h).

265 The transition from G2 phase to M phase represents a major checkpoint within the  
266 eukaryotic cell division cycle. As the *CYCB1;1* gene is expressed specifically at the G2  
267 to M transition during the cell cycle, *proCYCB1;1:GUS* is widely used as a reporter to  
268 monitor mitotic activity in plants (Colon-Carmona *et al.*, 1999). To further examine the  
269 effects of MB on the meristematic zone in Arabidopsis roots, 5-day old  
270 *proCYCB1;1:GUS* transgenic Arabidopsis seedlings were treated with 0 or 4  $\mu$ M MB  
271 for 24 h, and then histochemical analyses of GUS activity in roots were performed (Fig.  
272 6d, i). These tests revealed a significant reduction in GUS activity in roots of MB-  
273 treated seedlings compared with untreated seedlings, indicating that MB exposure leads  
274 to a reduction in mitotic activity within the root meristematic zone (Fig. 6d, i).

### 275 **MB downregulates the expression of transcription factors involved in maintaining** 276 **the root stem cell niche identity**

277 In the root meristem, a group of mitotically inactive quiescent center (QC) cells and the  
278 surrounding stem cells comprise the stem cell niche. The QC maintains the stem cell  
279 activity of the surrounding cells, thus functioning as an organizer of the root stem cell  
280 niche (Dinneny & Benfey, 2008). To test whether QC cellular function is impaired in  
281 MB-treated roots, the QC-expressed promoter trap line QC25 was employed (Sabatini  
282 *et al.*, 2003). Histochemical comparisons of GUS activity in MB-treated and untreated  
283 QC25 roots revealed an approximately 85% reduction in GUS expression in MB-  
284 treated root tips compared to that in the control plants, indicating an obvious loss of QC  
285 identity (Fig. 7a, f). QC cell identity is proposed to be maintained via both the  
286 PLETHORA (PLT) and SHORTROOT (SHR)/SCARECROW (SCR) pathways  
287 (Petricka *et al.*, 2012). PLT1 and PLT2 encode AP2-domain transcription factors, and  
288 the maintenance of the stem cell niche is thought to be PLT dosage-dependent (Galinha  
289 *et al.*, 2007). SHR and SCR belong to the GRAS transcription factor family. SHR is  
290 expressed in the central vascular tissue and moves into the adjacent cell layers to  
291 activate SCR transcription, then together with SCR maintain QC and stem cell identity

292 (Wysocka-Diller *et al.*, 2000; Nakajima *et al.*, 2001; Sabatini *et al.*, 2003). The  
293 expression of *proPLT1:PLT1-YFP*, *proPLT2:PLT2-YFP*, *proSHR:SHR-GFP* and  
294 *proSCR:GFP* reporters were also monitored in MB-treated and untreated transgenic  
295 seedling roots by confocal microscopy (Fig. 7b-j). The results of these analyses  
296 revealed that the activities of all four reporter genes were significantly reduced in roots  
297 of MB-treated seedlings compared with the activities observed in the untreated controls  
298 (Fig. 7b-j), indicating that MB exposure leads to disruptions in both the SHR/SCR and  
299 PLT regulatory pathways involved in QC cell identity maintenance.

### 300 **MB interferes with auxin biosynthesis and transport in the roots**

301 The expression of PLTs is dependent on endogenous auxin levels, with correct  
302 regulation requiring a distribution gradient of PLT protein having a maxima within the  
303 stem cell niche (Galinha *et al.*, 2007). The proper distribution gradient of PLTs is  
304 essential for meristem maintenance, and correct regulation of cell division and cell  
305 differentiation in roots (Galinha *et al.*, 2007). *proDR5:GFP* contains a minimal  
306 promoter fused to seven AuxRE repeats driving the expression of *GFP*, and is a reliable  
307 marker for monitoring auxin responses and distribution (Friml *et al.*, 2003). *DII-*  
308 *VENUS*, an auxin sensor, is rapidly degraded in response to auxin and has been used  
309 to visualize dynamic changes in cellular auxin distribution (Brunoud *et al.*, 2012).  
310 Comparisons between MB-treated and untreated roots using confocal microscopy  
311 indicated that expression of the auxin inducible *proDR5:GFP* reporter was reduced by  
312 approximately 42% in response to MB exposure (Fig. 8a, f). In contrast, the expression  
313 of *DII-VENUS* was increased in MB-treated plants (Fig. 8b, g), indicating that MB  
314 exposure is associated with a reduction in auxin content in roots.

315 Both local auxin biosynthesis and polar auxin transport are indispensable to root  
316 meristem maintenance (Grieneisen *et al.*, 2007; Brumos *et al.*, 2018). The tryptophan-  
317 dependent pathway represents the major biosynthetic auxin pathway in Arabidopsis  
318 (Mashiguchi *et al.*, 2011). ASA1 (ANTHRANILATE SYNTHASE 1) catalyzes the  
319 first reaction of tryptophan biosynthesis, TAA1 (TRYPTOPHAN  
320 AMINOTRANSFERASE of ARABIDOPSIS 1) converts tryptophan to indole-3-

321 pyruvic acid (Zhao, 2014), and YUCCA proteins encode flavin monooxygenase which  
322 catalyzes the rate-limiting step in tryptophan-dependent auxin biosynthesis – the  
323 conversion of indole-3-pyruvic acid to IAA (Mashiguchi *et al.*, 2011). Transcript levels  
324 for *ASA1*, *TAA1*, *YUCCA2*, *YUCCA3* and *YUCCA6* were also analyzed in MB-treated  
325 and untreated roots by qRT-PCR (Fig. 8k-o). Significant reductions in *TAA1* and  
326 *YUCCA3* transcript levels were observed in the MB-treated seedlings relative to the  
327 control treatments, whereas *YUCCA6* transcript levels increased (Fig. 8l, n, o).  
328 Transcript levels for *ASA1* and *YUCCA2* did not show obvious changes in response to  
329 MB exposure.

330 PIN1, PIN2 and PIN3, together with other PIN proteins, control auxin distribution  
331 in Arabidopsis (Friml *et al.*, 2002; Blilou *et al.*, 2005), therefore we also examined the  
332 potential effects of MB on the expression of *proPIN1:PIN1-GFP*, *proPIN2:PIN2-GFP*  
333 and *proPIN3:PIN3-GFP* reporter genes. Comparisons between MB-treated and  
334 untreated roots using confocal microscopy indicated that the expression of the  
335 *proPIN1:PIN1-GFP*, *proPIN2:PIN2-GFP* and *proPIN3:PIN3-GFP* reporters were all  
336 significantly decreased in roots by MB exposure (Fig. 8c-e, h-j). These results suggest  
337 that polar auxin transport may also be disrupted in MB-exposed seedlings through the  
338 inhibition of PIN protein expression

339 Among all PIN proteins, loss of PIN1 function results in the most severe  
340 phenotypic effects in Arabidopsis (Blilou *et al.*, 2005). To determine whether the  
341 observed potential reduction in PIN protein levels was associated with the proteasome-  
342 dependent protein degradation pathway, *pro:PIN1:PIN1-GFP* seedlings were  
343 simultaneously treated with the proteasome inhibitor MG132 and MB (Fig. S2). PIN1  
344 levels in roots of MG132 plus MB-treated seedlings did not differ from that of MB-  
345 treated seedlings (Fig. S2b). Nitric oxide (NO) has been reported to negatively regulate  
346 PIN1 protein levels in a proteasome-independent manner in Arabidopsis (Fernandez-  
347 Marcos *et al.*, 2011). We therefore also examined effects of the NO scavenger 2-(4-  
348 carboxyphenyl)-4,4,5,5-tetramethylimidazole-1-oxyl-3-oxide (cPTIO) on PIN1  
349 expression. As was observed for addition of MG132, PIN1 levels in roots of cPTIO

350 plus MB-treated seedlings did not differ from that of MB-treated seedlings (Fig. S2b).  
351 Collectively, these results suggest that the observed MB-associated reduction in PIN1  
352 protein levels occurs independently of the proteasome degradation pathway and NO  
353 signaling.

#### 354 **Exogenous auxin partially rescues MB-induced growth inhibition**

355 Given the present results that the content of auxin was reduced in the MB-treated root  
356 tips, it is reasonable to speculate that MB-induced growth inhibition could be reversed  
357 by exogenous application of auxin. Arabidopsis seedlings were treated with MB plus  
358 various concentrations of the synthetic auxin naphthaleneacetic acid (NAA; Fig. 9). Co-  
359 application of 10 nM NAA plus 2  $\mu$ M MB showed a slight, but significant increase in  
360 primary root length compared with MB treatment alone (Fig. 9a, c-d). However, root  
361 hair production in seedlings grown under these conditions was severely reduced relative  
362 to untreated seedlings, and did not differ significantly from that observed in seedlings  
363 treated with MB alone (Fig. 9b). Surprisingly, in the 100 nM NAA plus MB treatment,  
364 root hair production was fully rescued by the addition of NAA from MB inhibition (Fig.  
365 9b). These results reveal that exogenously-supplied auxin can partially rescue the  
366 inhibitory effects of MB on Arabidopsis root development.

#### 367 **Discussion**

368 The identification and characterization of allelochemicals is central to our  
369 understanding of plant-plant allelopathy, and the ecophysiological roles played by these  
370 compounds (Einhellig & Souza, 1992). Some of the most extensively studied examples  
371 include the phenolic lipid sorgoleone, benzoxazinoids such as 4-dihydroxy-2H-1,4-  
372 benzoxazin-3(4H)-one (DIBOA), and the diterpene momilactones. Sorgoleone is  
373 released from the root hairs of members of the genus *Sorghum*, and inhibits seedling  
374 growth in numerous weed species at 10  $\mu$ M concentrations, causing reductions in  
375 biomass accumulation in both the root system as well as aerial plant parts (Einhellig &  
376 Souza, 1992). In maize plants, the compound 2-Amino-3H-phenoxazin-3-one (APO) is  
377 a degradation product derived from the root system-exuded allelochemical DIBOA, and

378 displays strong inhibitory effects on seed germination and the growth of root and shoot  
379 systems of receiver plants *in vitro* at concentrations above approximately 100  $\mu$ M  
380 (Macias *et al.*, 2005; Venturelli *et al.*, 2015). Numerous studies have identified MB as  
381 the most active allelochemical secreted from the roots of rice plants (Kato-Noguchi *et al.*  
382 *et al.*, 2002; Kato-Noguchi *et al.*, 2010; Xu *et al.*, 2012). In the present work, we found  
383 that MB displayed inhibitory effects on seed germination and primary root growth in  
384 *Arabidopsis* at concentrations as low as 2  $\mu$ M when tested *in vitro* (Fig. 5, 6). Moreover,  
385 MB inhibited lateral root emergence, root hair production, cotyledon greening, and also  
386 delayed the initiation of true leaves (Fig. 1 & Fig. 6). Experiments utilizing a CRISPR-  
387 Cas9 genome editing-derived rice *OsCPS4* knockout line (deficient in momilactone  
388 biosynthesis) also exhibited a significant reduction in allelopathy against barnyard grass,  
389 relative to wild-type rice plants (Fig. 5). As the phytotoxic activity of MB is in some  
390 cases much greater than that reported for other allelochemicals (Kato-Noguchi & Peters,  
391 2013; Kong *et al.*, 2019), MB could also potentially serve as a natural products-based  
392 herbicide.

393 The inhibition of germination of receiver plants is frequently found to be a target  
394 in plant-plant allelopathic interactions. Hormones, especially GA and ABA, play  
395 central roles in the regulation of seed germination and have also been shown to be  
396 involved in the inhibition of seed germination by allelochemicals (Tuan *et al.*, 2018).  
397 For example, the accumulation of ABA in tomato seeds was observed after treatment  
398 with the aqueous leachate of the allelopathic weed *Sicyos deppei* G. Don  
399 (Cucurbitaceae), leading to delayed germination (Lara-Nunez *et al.*, 2009). Myriganone  
400 A, an allelochemical isolated from fruit leachates of *Myrica gale* L. (sweet gale),  
401 inhibits *Lepidium sativum* seed germination by interference with GA biosynthesis and  
402 increasing apoplastic reactive oxygen species (ROS) production (Oracz *et al.*, 2012).  
403 Recently coumarin, which has been reported to play a role in allelopathic interactions,  
404 was also shown to inhibit rice seed germination by suppressing ABA catabolism and  
405 promoting ROS accumulation (Chen *et al.*, 2019). Additionally, seed storage protein  
406 mobilization, a process regulated by ABA, has been shown to be impaired in response



407 to MB treatment in germinating seeds (Kato-Noguchi *et al.*, 2013), suggesting that  
408 ABA may be involved in the MB-mediated inhibition of seed germination. Despite  
409 these reports however, relatively little direct genetic evidence exists concerning the  
410 potential roles played by phytohormones in allelopathic interactions. In the present  
411 study we found that MB treatment markedly increased the expression of the ABA  
412 biosynthetic genes *NCED3*, *NCED6* and *NCED9*, as well as the ABA signaling  
413 pathway genes *ABI3*, *ABI5*, *EM1*, *EM6*, *RD29A* and *ABI4* (Fig. 2). Genetic analyses  
414 showed that loss of *ABI4* function significantly reduced the inhibition of seed  
415 germination caused by MB exposure (Fig. 3). Although the expressions of several  
416 *DELLA* genes were increased in MB-treated Arabidopsis seedlings, exogenously-  
417 provided GA did not rescue the inhibitory effects of MB on seed germination (Fig. 4).  
418 In fact, GA addition appeared to exacerbate the inhibitory effects of MB on seed  
419 germination, via an unknown mechanism. Thus, the present results clearly support a  
420 role for ABA biosynthesis and/or signaling in the mechanism underlying MB-mediated  
421 germination inhibition, whereas a potential role for GA is less evident.

422 For some plant-plant allelopathic interactions, the inhibition of receiver seedling  
423 root system growth may occur in the absence of any obvious inhibitory effects on  
424 germination. In fact, a number of putative allelochemicals exhibit this type of activity,  
425 including sorgoleone, coumarin, benzoic acid and cyanamide (Einhellig & Souza, 1992;  
426 Soltys *et al.*, 2012; Lupini *et al.*, 2014; Zhang *et al.*, 2018). For example, sorgoleone  
427 does not affect the germination of the weed *Eragrostis tef*, but does suppress root and  
428 shoot system growth in *Eragrostis* seedlings (Einhellig & Souza, 1992). The inhibitory  
429 effect of sorgoleone on root growth involves a reduction in the activity of root H<sup>+</sup>-  
430 ATPase as well as delayed cell division (Hejli & Koster, 2004). Coumarin is also a  
431 putative allelochemical that is widely-distributed throughout the plant kingdom.  
432 Coumarin has been shown to inhibit primary root elongation and stimulate lateral root  
433 formation (Lupini *et al.*, 2014). Mutation of the root-specific auxin influx transporter  
434 AUX1 rescues root growth inhibition by coumarin, indicating that coumarin might act  
435 via interference with polar auxin transport (Lupini *et al.*, 2014). Benzoic acid is another



436 putative allelochemical found within the root exudates of numerous plant species.  
437 Exposure to this compound up-regulates the expression of auxin biosynthetic genes as  
438 well as the auxin polar transporter genes *AUX1* and *PIN2* in roots, resulting in increased  
439 auxin levels which may be responsible for the observed benzoate-mediated inhibition  
440 of primary root growth (Zhang *et al.*, 2018). Thus, auxin biosynthesis and/or signaling  
441 could represent processes which are frequent targets for allelochemicals.

442 Consistent with prior studies performed by (Kato-Noguchi *et al.*, 2012), we found  
443 that MB strongly inhibited primary root growth, and in the present work we also show  
444 this inhibition is associated with a substantial reduction in root meristem activity (Fig.  
445 7). Stem cell niche activity within the root meristem is specified and maintained by two  
446 parallel pathways: the PLT pathway and the SHR/SCR pathway (Cederholm *et al.*,  
447 2012). Auxin is a key regulator in stem cell positioning, and forms a gradient  
448 distribution pattern within the root meristem (Cederholm *et al.*, 2012). The asymmetric  
449 distribution of auxin is generated and maintained by the auxin transporters (Blilou *et al.*,  
450 2005). In response to auxin within the root meristem, PLT proteins display a  
451 gradient which guides the progression of cells from stem cell state, to transit-amplifying  
452 cell state, and finally to differentiation (Galinha *et al.*, 2007). PLT proteins regulate the  
453 expression of PIN genes to stabilize the auxin gradient in the root meristem (Galinha *et al.*,  
454 2007). The SHR/SCR pathway controls the radial positioning of the quiescent  
455 center and is auxin-independent (Wysocka-Diller *et al.*, 2000; Nakajima *et al.*, 2001).  
456 In this study, we found that MB treatment downregulated the expressions of *QC25*,  
457 *PLT1/PLT2* and *SHR/SCR* (Fig. 7). Auxin content in root tips was monitored by the  
458 auxin sensor DII-VENUS, and the auxin responsive reporter *proDR5:GFP* (Brunoud  
459 *et al.*, 2012). Both assays indicated that MB exposure led to reduced auxin content in  
460 root tips (Fig. 8a-b, f-g), which is essential for root meristem maintenance (Brumos *et al.*,  
461 2018). qRT-PCR analyses of representative auxin biosynthetic pathway genes,  
462 particularly *TAA1* and *YUCCA3*, indicated that auxin biosynthesis is inhibited by MB  
463 (Fig. 8k-o). The levels of PIN proteins PIN1, PIN2 and PIN3 were dramatically  
464 decreased after MB treatment (Fig. 8c-e, h-j). Application of the proteasome inhibitor

465 MG132 or the nitrous oxide scavenger cPTIO could not reverse the observed reduction  
466 of PIN1 protein in MB-treated root tips, indicating that this occurred independently of  
467 the proteasome pathway and nitrous oxide. In addition, exogenous auxin partially  
468 restored root growth in the presence of MB, and fully restored the production of root  
469 hairs (Fig. 9). Taken together, these results suggest that the inhibitory effects of MB on  
470 root growth may also involve the disruption of auxin biosynthesis and PIN-mediated  
471 polar auxin transport.

472 In summary, this study provides significant insights into the mechanisms  
473 underlying the inhibition of germination and early seedling establishment by  
474 momilactone B. MB-mediated interference of plant growth may involve multiple  
475 cellular targets, including the phytohormones ABA and auxin and their respective  
476 biosynthetic and signaling pathways. Our results suggest that MB-mediated inhibition  
477 of seed germination may occur via induction of the ABA signaling pathway and ABA  
478 biosynthesis, and the inhibition of root growth by MB could be due, at least in part, to  
479 a reduction in auxin production and interference with polar auxin transport, thereby  
480 impairing the maintenance of the root apical meristem. Thus, the vital regulatory roles  
481 played by various phytohormones during seedling development could render their  
482 respective pathways as highly effective targets for allelochemical interference.

## 483 **MATERIALS AND METHODS**

### 484 **Plant materials and growth conditions**

485 The wild-type *Arabidopsis* ecotype Columbia (WT(At)) and the wild-type genotype  
486 rice *Oryza sativa* L. cv. Shishoubaimao (WT(Os)) were used in this study. Some of the  
487 plant materials in this study have been described previously: *proCyclinB1;1:GUS*  
488 (Colon-Carmona *et al.*, 1999); *QC25:GUS* (Sabatini *et al.*, 2003); *proPLT1:PLT1-YFP*  
489 and *proPLT2:PLT2-YFP* (Galinha *et al.*, 2007); *proSHR:SHR:GFP* (Nakajima *et al.*,  
490 2001); *proSCR:GFP* (Wysocka-Diller *et al.*, 2000); *proDR5rev:GFP* (Friml *et al.*,  
491 2003); *DII-VENUS* (Brunoud *et al.*, 2012); *pro:PIN1:PIN1-GFP* (Benkova *et al.*, 2003);

492 *pro:PIN2:PIN2-GFP* (Blilou et al., 2005); *pro:PIN3:PIN3-GFP* (Zadnikova et al.,  
493 2010); *abi4* (Shu et al., 2013).

494 Arabidopsis seeds were surface sterilized and plated on half strength MS medium  
495 supplemented with 1% sucrose and 0.7% agar, and then stratified in the dark at 4°C for  
496 2 days before being allowed to germinate at 22°C under long-day conditions (16 h of  
497 light/8 h of dark). One-week old seedlings were then transferred to soil for growth at  
498 22°C under long-day conditions (16 h of light/8 h of dark) (Wu et al., 2015a). Rice  
499 seeds were surface sterilized and germinated on water-soaked filter paper for 3 d in dark  
500 at 30°C. The germinated rice seedlings were then planted in rice paddy fields.

### 501 **Isolation of MB**

502 Momilactone B was isolated from rice hulls in our laboratory as described by Gu et al.  
503 (2019). Its structure was confirmed by using 1D and 2D NMR in combination with ESI-  
504 MS and HR-EIMS.

### 505 **Seed germination assays**

506 Arabidopsis plants were grown in a green house at 22°C under long-day conditions (16  
507 h of light/8 h of dark). The seeds were harvested and stored in a dry cabinet for 6 months  
508 to break seed dormancy (Shu et al., 2013). To analyze the effect of MB on seed  
509 germination of Arabidopsis, seeds were surface sterilized for 5 min in 70% (v/v) ethanol,  
510 washed three times with sterile water, distributed on half strength MS medium, with  
511 0.7% (w/v) agar, 1% (w/v) sucrose, and MB at the indicated concentrations, and chilled  
512 in the dark at 4°C for 2 days before being allowed to germinate at 22°C. Germination  
513 frequency was scored based on recognizable radicle protrusion. Seedling morphology  
514 was scored based on cotyledon expansion and greening.

### 515 **Root growth assays**

516 To examine the effect of MB on root growth of barnyardgrass (*Echinochloa crus-galli*  
517 L.) and Arabidopsis, seedlings were grown vertically on half strength MS agar medium  
518 for 2 d or 5 d, respectively, and then transferred to fresh medium supplemented with

519 MB at the indicated concentrations. Root and shoot length, as well as lateral root  
520 numbers were measured after treatments.

### 521 **Plasmid construction and rice transformation**

522 To create the *OsCPS4* (*LOC\_Os04g09900*) deficient rice mutant, the CRISPR-Cas9  
523 genome editing method (Xie *et al.*, 2017) was employed to generate the construct *KO-*  
524 *OsCPS4*, targeting the site (GTTTGGGCAGCCAGCATCGG) specific for *OsCPS4*.  
525 The resulting construct was transformed into *Oryza sativa* L. cv. Shishoubaimao (Toki  
526 *et al.*, 2006). The homozygous mutant *oscps4* lacking the CRISPR construct was  
527 identified and used for further study.

### 528 **Co-culture assay for evaluating rice allelopathy**

529 The assay used for evaluating allelopathic activity was performed as previously  
530 described with slight modifications (Xu *et al.*, 2012). Seeds of WT rice and *oscps4* were  
531 surface sterilized and germinated on water-soaked filter paper for 3 days. Six uniformly  
532 developed seedlings of each species were transplanted to each of 15 plates containing  
533 water-soaked filter paper. Ten surface-sterilized receiver plant seeds (lettuce or  
534 barnyard grass) in each plate were co-cultured with the seedlings for 6 days.

### 535 **Analysis of transcript levels**

536 Arabidopsis seedlings germinated on medium containing 0 or 4  $\mu$ M MB for 48 h were  
537 harvested. Realtime PCR analysis was conducted as described previously with slight  
538 modifications (Wu *et al.*, 2015b). Total RNA was extracted using a Plant RNA Kit  
539 (R6827, Omega) and then reverse transcribed using PrimeScript™ RT Master Mix  
540 (RR036Q, Takara) per the manufacturer's instructions. The resulting cDNA templates  
541 were subject to qRT-PCR analyses using TB Green® Premix Ex Taq™ II (RR820Q,  
542 Takara) with a StepOne™ Real-Time PCR System (Applied Biosystems) according  
543 to the manufacturer's instructions. *ACTIN2* (*AT3G18780*) was used as a reference gene.  
544 Data presented are means from three biological replicates with SD. Statistical  
545 significance was evaluated by Student's t test. The primers used are listed in  
546 Supplemental Table S1.

## 547 **Histochemical and microscopy analyses**

548 Histochemical analyses of GUS activities in the roots of CYCB1;1:GUS and QC25  
549 plants were performed according to methods described previously with slight  
550 modifications (Jefferson *et al.*, 1987). Whole seedlings were stained in GUS staining  
551 solution (1 mg/mL X-glucuronide in 0.1M potassium phosphate, pH 7.2, 0.5 mmol/L  
552 ferrocyanide, 0.5 mmol/L ferricyanide, and 0.1% Triton X-100) at 37 °C in the dark for  
553 12 h. After staining, seedlings were cleared and photographed using a Leica DM6  
554 microscope.

555 For confocal microscopy imaging, Arabidopsis roots were stained with 10 mg/mL  
556 propidium iodide (PI) for 5 min, washed once in distilled water, and mounted in water.  
557 Samples were captured using a ZEISS LSM800 confocal laser-scanning microscope  
558 with the following excitation/emission wavelengths: 561 nm/600 to 655 nm for PI, 488  
559 nm/498 to 552 nm for GFP and 514 nm/530 to 600 nm for YFP respectively (Zheng *et al.*,  
560 2018). Fluorescence intensities were measured using ImageJ  
561 (<http://imagej.nih.gov/ij/>) and statistical significance was evaluated by Student's t test.

## 563 **ACKNOWLEDGMENTS**

564 We thank the ABRC (Arabidopsis Biological Resource Center) and Drs. Ben Scheres,  
565 Philip Benfey, Chengwei Yang and Chuanyou Li for sharing their published materials  
566 used in this study. We also thank Dr. Yaoguang Liu for providing CRISPR-Cas9  
567 vectors, and Dr. Ying-Tang Lu for very helpful discussions.

## 569 **Figure legends**

570 **Figure 1.** MB inhibits seed germination and seedling establishment of Arabidopsis.  
571 Seeds of wild-type Arabidopsis ecotype Columbia were plated on half strength MS  
572 medium with or without 4 µM MB, and seed germination and cotyledon greening were  
573 examined at the indicated time points. (a) Phenotypes of seedlings 4 d after MB

574 treatment. (b) Percent germination shown at 12 h intervals. (c) Percent cotyledon  
575 greening 4 d after MB treatment. Values are mean  $\pm$  SD from five biological replicates.  
576

577 **Figure 2.** Effect of Momilactone B (MB) exposure on ABA and GA pathway-related  
578 transcript levels in Arabidopsis. Seeds of wild-type Arabidopsis were plated on half  
579 strength MS medium in the presence or absence of 4  $\mu$ M MB. 4-day-old seedlings were  
580 harvested. Relative transcript levels of representative genes involved in ABA  
581 biosynthesis (a), GA biosynthesis (b), ABA signaling (c), ABA response (d), and GA  
582 signaling (e) were monitored by real-time qRT-PCR. The relative gene expression  
583 values were normalized to that of the internal control ACTIN2, and then calculated by  
584 comparing the value with that of control treatments. Values are mean  $\pm$  SD from three  
585 independent biological replicates. Asterisks indicate significant differences between  
586 MB-treated and control (CK) plants (\*\*,  $P < 0.01$ ; Student's t-test).

587

588 **Figure 3.** Deficiency in ABI4 increases tolerance of Arabidopsis to momilactone B  
589 (MB). Seeds of WT(At) and ABA deficient mutant *abi4* were plated on half strength  
590 MS medium containing either 0, 2 or 4  $\mu$ M MB. Percentage of seed germination and  
591 cotyledon greening were determined at the indicated time points. (a) Phenotypes of  
592 WT(At) and *abi4* seedlings are shown in response to different control or momilactone  
593 B treatments. Percent seed germination (b) and cotyledon greening (c) are shown at  
594 different time points for control and momilactone B treatments. Values are mean  $\pm$  SD  
595 from five biological replicates.

596

597 **Figure 4.** Exogenous GA is unable to reverse the inhibitory effects of momilactone B  
598 (MB) on Arabidopsis seed germination. Seeds of wild-type Arabidopsis ecotype  
599 Columbia were germinated on half strength MS medium supplemented with 2  $\mu$ M MB,  
600 40  $\mu$ M GA and their combination. (a) Phenotypes of WT(At) under various treatments;  
601 (b) percent seed germination, (c) percent cotyledon greening. Values are mean  $\pm$  SD

602 from five biological replicates. Letters above bars indicate significant differences  
603 among groups ( $P < 0.05$ , Student–Newman–Keuls test).

604

605 **Figure 5.** Momilactone B (MB) inhibits root development of barnyard grass.  
606 Phenotypes (a), shoot (b), and root (c) lengths of barnyard grass seedlings co-cultured  
607 with WT(Os) and *oscps4* knockout rice plants. Phenotypes (d), root (e), and shoot (f)  
608 lengths of barnyard grass seedlings treated with MB for 2 d. For barnyard grass values  
609 are mean  $\pm$  SD from 25 seedlings. For MB treatments, values are mean  $\pm$  SD from 15  
610 seedlings. Asterisks indicate significant differences (\*,  $P < 0.05$ ; Student’s t-test).

611

612 **Figure 6.** MB-mediated inhibition of Arabidopsis root development. (a) Phenotypes of  
613 wild-type Arabidopsis ecotype Columbia WT(At) seedlings treated with various  
614 concentration of MB. (b) Root morphology of seedlings described in (a). (c) Root  
615 meristem of seedlings described in (a). (d) Histochemical analysis of GUS activity in  
616 roots of *proCYCB1;1:GUS* plants in response to 4  $\mu$ M MB. Statistical analyses of  
617 primary root length (e), lateral root number (f), root meristem zone length (g) and root  
618 cortical cell numbers (h) of seedlings described in (a). (i) Statistical analysis of GUS  
619 activity in roots shown in (d). For quantitative analyses of the root phenotypes, values  
620 represent mean  $\pm$  SD from at least 15 seedlings. For GUS activity analysis, at least 8  
621 seedlings were tested, and the values representing mean  $\pm$  SD are shown relative to  
622 control values. Letters above bars indicate significant differences among treatments ( $P$   
623  $< 0.05$ , Student–Newman–Keuls test). Asterisks indicate significant differences (\*\*,  $P$   
624  $< 0.01$ ; Student’s t-test).

625

626 **Figure 7.** Momilactone B (MB) affects the expression of PLT1/ PLT2 and SCR/SHR  
627 in roots. (a) Histochemical analysis of GUS activity in Arabidopsis promoter trap line  
628 QC25 in response to 4  $\mu$ M MB. (b-e) Expression of *proPTL1:PTL1-YFP* (b),  
629 *proPTL2:PTL2-YFP* (c), *proSHR:SHR-GFP* (d) and *proSCR: GFP* (e) reporter genes  
630 in seedling roots grown for one day in the presence or absence of 4  $\mu$ M MB. (f)



631 Quantification of GUS activity of roots described in (a). (g-j) Quantification of the  
632 florescence intensity of roots described in (b-e). Data represent mean  $\pm$  SD from at least  
633 eight seedlings. Values are shown relative to controls. Asterisks indicate significant  
634 differences (\*\*,  $P < 0.01$ ; Student's t-test).

635

636 **Figure 8.** Effects of momilactone B (MB) on auxin pathway in Arabidopsis roots.  
637 Expression of *proDR5:GFP* (a), *DII-VENUS* (b), *proPIN1:PIN1-GFP* (c),  
638 *proPIN2:PIN2-GFP* (d), and *proPIN3:PIN3-GFP* (e) in root tips grown for 1 d in the  
639 presence or absence of 4  $\mu$ M MB. (f-j) Quantification of florescence intensity in roots  
640 described in (a-e). Relative transcript levels for selected auxin biosynthetic pathway  
641 genes (k-o) in root tips in response to MB. For quantification of florescence intensity,  
642 data represent mean  $\pm$  SD from at least eight seedlings. Values are shown relative to  
643 controls. For qRT-PCR analyses, data represent mean  $\pm$  SD from three biological  
644 replicates. Asterisks indicate significant differences (\*\*,  $P < 0.01$ ; Student's t-test).

645

646 **Figure 9.** NAA partially rescues the inhibitory effects of momilactone B (MB) on root  
647 growth. (a) Phenotypes of wild-type Arabidopsis seedlings treated with various  
648 concentrations of NAA and 2  $\mu$ M MB for 3 days; (b) Phenotypes of the roots described  
649 in (a) at higher magnification; (c-d) Statistical analyses of the primary root lengths  
650 described in (a). Values represent mean  $\pm$  SD from at least 15 seedlings. Letters above  
651 bars indicate significant differences among treatments ( $P < 0.05$ , Student–Newman–  
652 Keuls test).

653



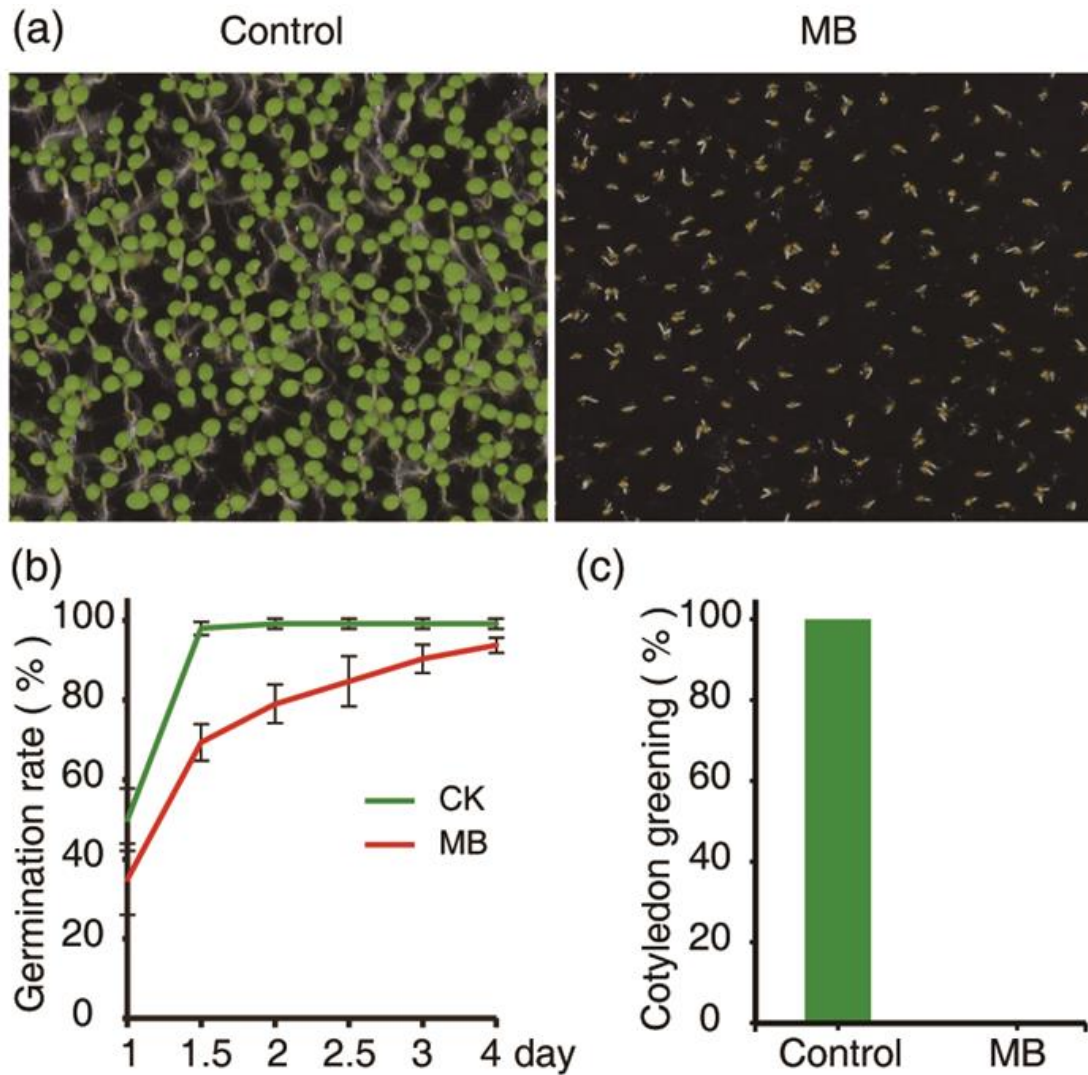

654

655 **Figure 1.** MB inhibits seed germination and seedling establishment of Arabidopsis.

656 Seeds of wild-type Arabidopsis ecotype Columbia were plated on half strength MS

657 medium with or without 4  $\mu$ M MB, and seed germination and cotyledon greening were

658 examined at the indicated time points. (a) Phenotypes of seedlings 4 d after MB

659 treatment. (b) Percent germination shown at 12 h intervals. (c) Percent cotyledon

660 greening 4 d after MB treatment. Values are mean  $\pm$  SD from five biological replicates.

661

662

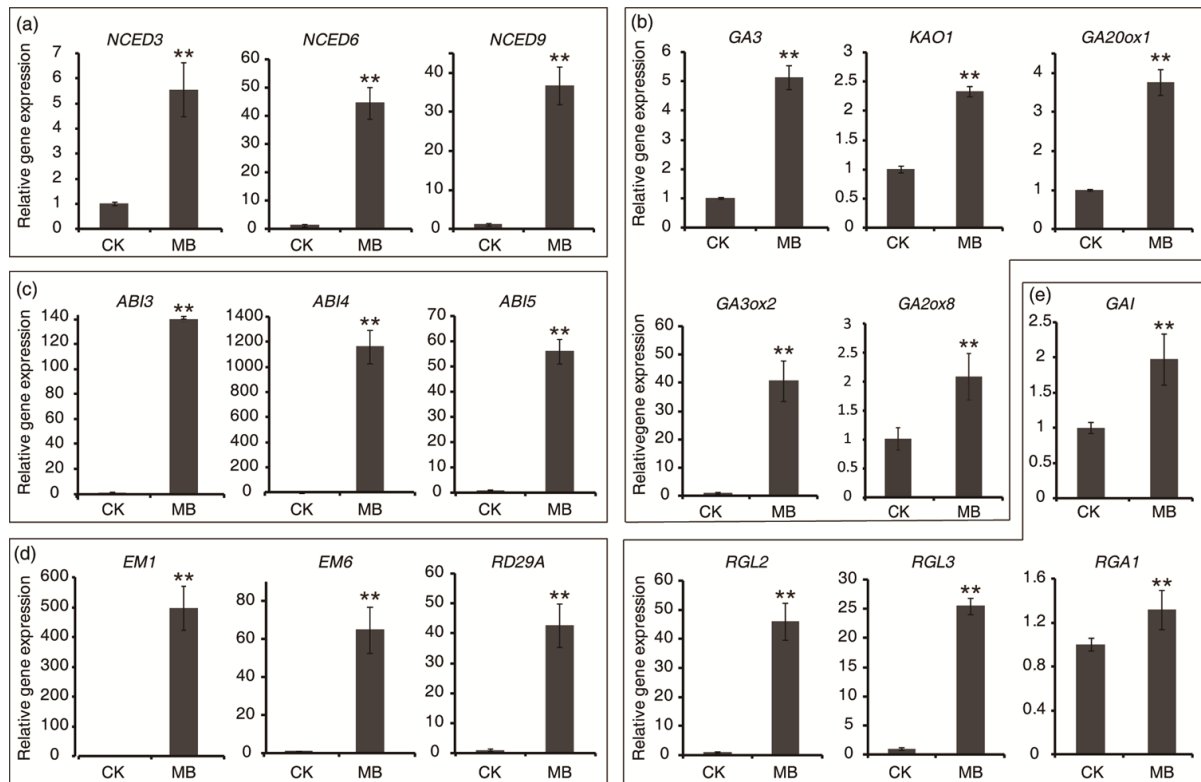

663

664

**Figure 2.** Effect of Momilactone B (MB) exposure on ABA and GA pathway-related

665

transcript levels in Arabidopsis. Seeds of wild-type Arabidopsis were plated on half

666

strength MS medium in the presence or absence of 4  $\mu$ M MB. 4-day-old seedlings were

667

harvested. Relative transcript levels of representative genes involved in ABA

668

biosynthesis (a), GA biosynthesis (b), ABA signaling (c), ABA response (d), and GA

669

signaling (e) were monitored by real-time qRT-PCR. The relative gene expression

670

values were normalized to that of the internal control ACTIN2, and then calculated by

671

comparing the value with that of control treatments. Values are mean  $\pm$  SD from three

672

independent biological replicates. Asterisks indicate significant differences between

673

MB-treated and control (CK) plants (\*\*,  $P < 0.01$ ; Student's t-test).

674

675

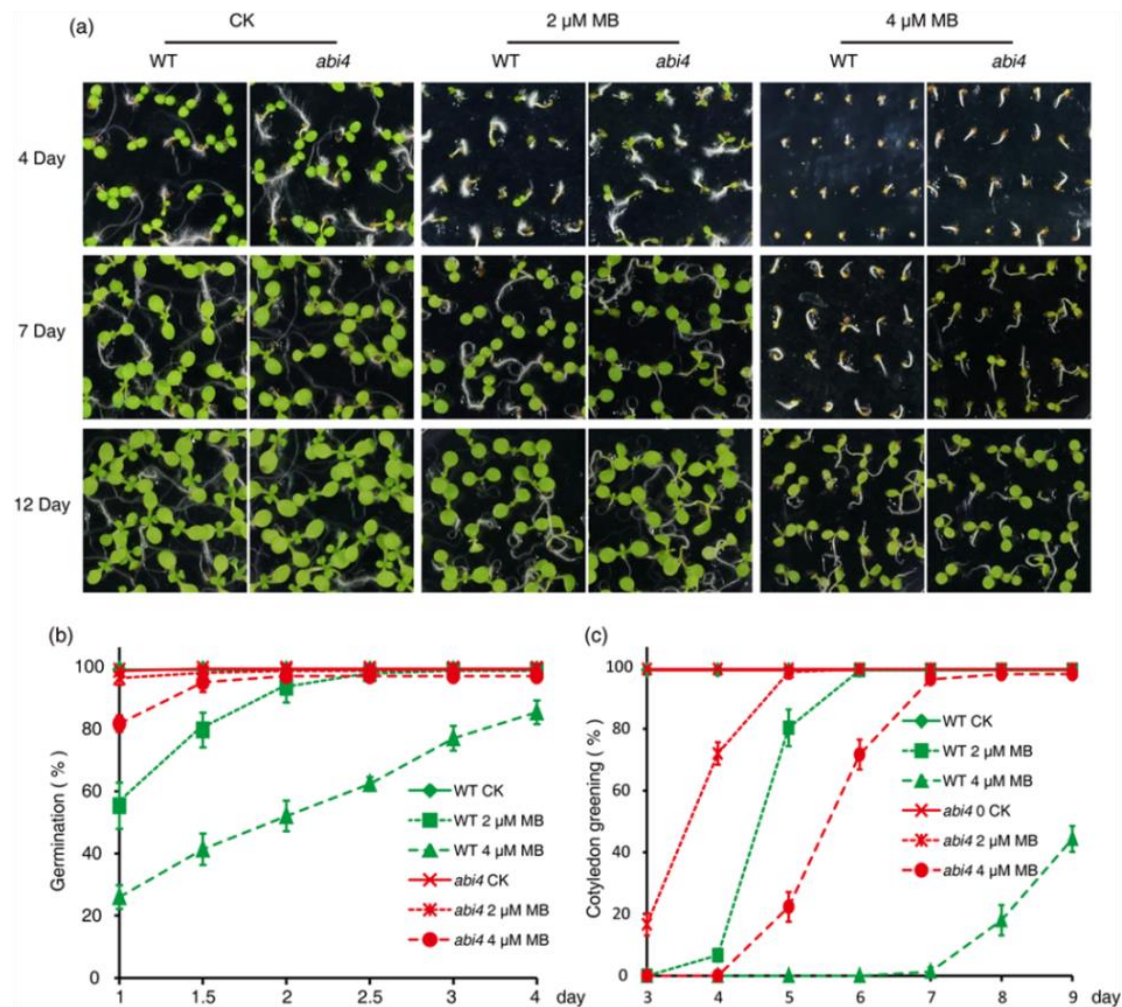

676

677 **Figure 3.** Deficiency in ABI4 increases tolerance of Arabidopsis to momilactone B  
 678 (MB). Seeds of WT(*At*) and ABA deficient mutant *abi4* were plated on half strength  
 679 MS medium containing either 0, 2 or 4  $\mu$ M MB. Percentage of seed germination and  
 680 cotyledon greening were determined at the indicated time points. (a) Phenotypes of  
 681 WT(*At*) and *abi4* seedlings are shown in response to different control or momilactone  
 682 B treatments. Percent seed germination (b) and cotyledon greening (c) are shown at  
 683 different time points for control and momilactone B treatments. Values are mean  $\pm$  SD  
 684 from five biological replicates.

685

686

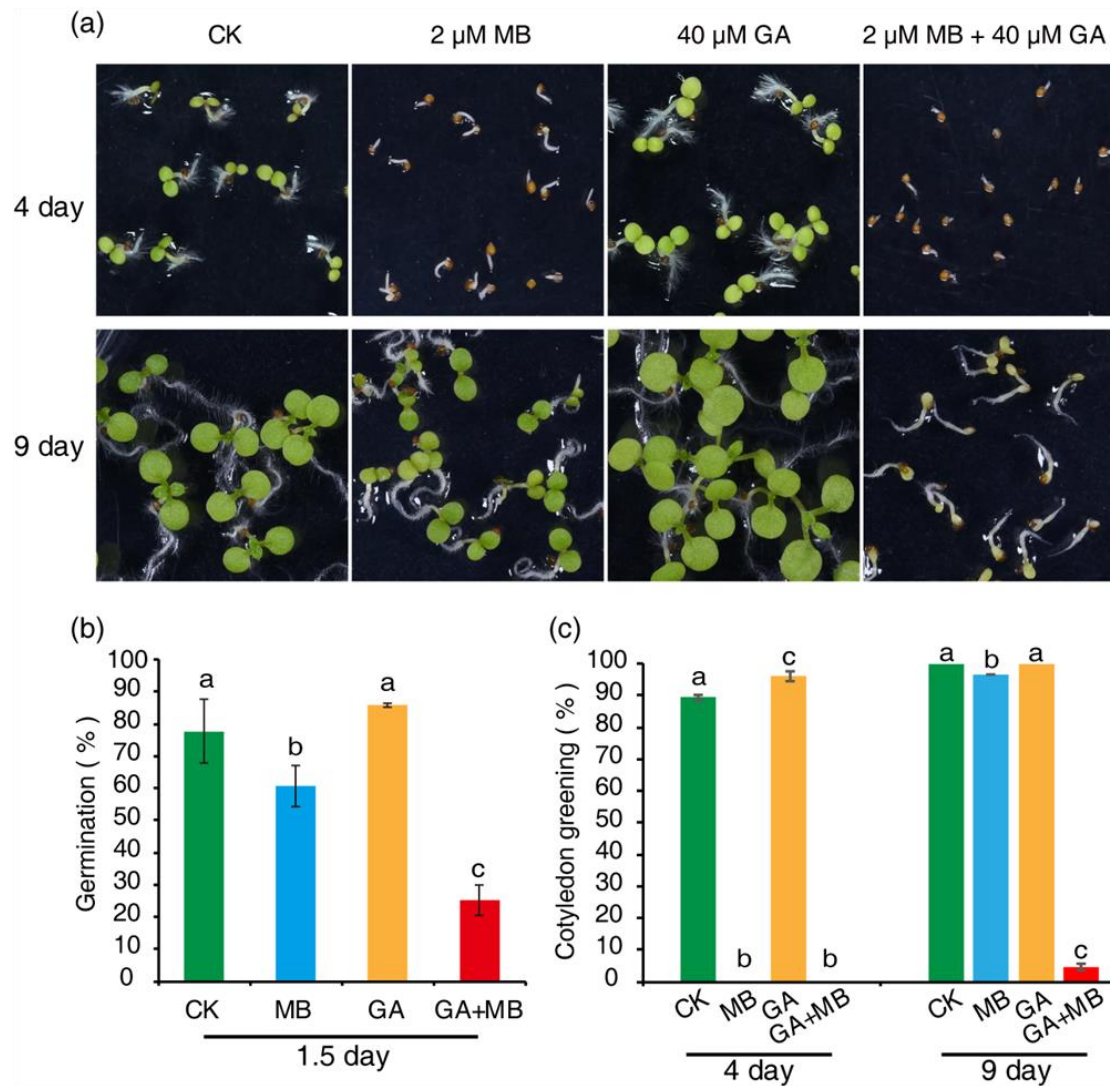

687

688 **Figure 4.** Exogenous GA is unable to reverse the inhibitory effects of momilactone B

689 (MB) on Arabidopsis seed germination. Seeds of wild-type Arabidopsis ecotype

690 Columbia were germinated on half strength MS medium supplemented with 2  $\mu$ M MB,

691 40  $\mu$ M GA and their combination. (a) Phenotypes of WT(Ar) under various treatments;

692 (b) percent seed germination, (c) percent cotyledon greening. Values are mean  $\pm$  SD

693 from five biological replicates. Letters above bars indicate significant differences

694 among groups ( $P < 0.05$ , Student–Newman–Keuls test).

695

696



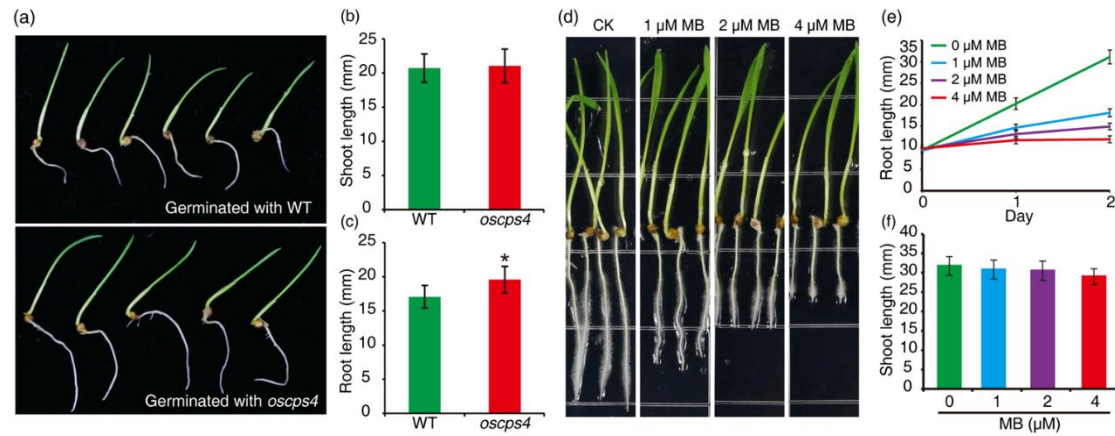

697

698 **Figure 5.** Momilactone B (MB) inhibits root development of barnyard grass.

699 Phenotypes (a), shoot (b), and root (c) lengths of barnyard grass seedlings co-cultured

700 with WT(Os) and *oscps4* knockout rice plants. Phenotypes (d), root (e), and shoot (f)

701 lengths of barnyard grass seedlings treated with MB for 2 d. For barnyard grass values

702 are mean ± SD from 25 seedlings. For MB treatments, values are mean ± SD from 15

703 seedlings. Asterisks indicate significant differences (\*,  $P < 0.05$ ; Student's t-test).

704

705

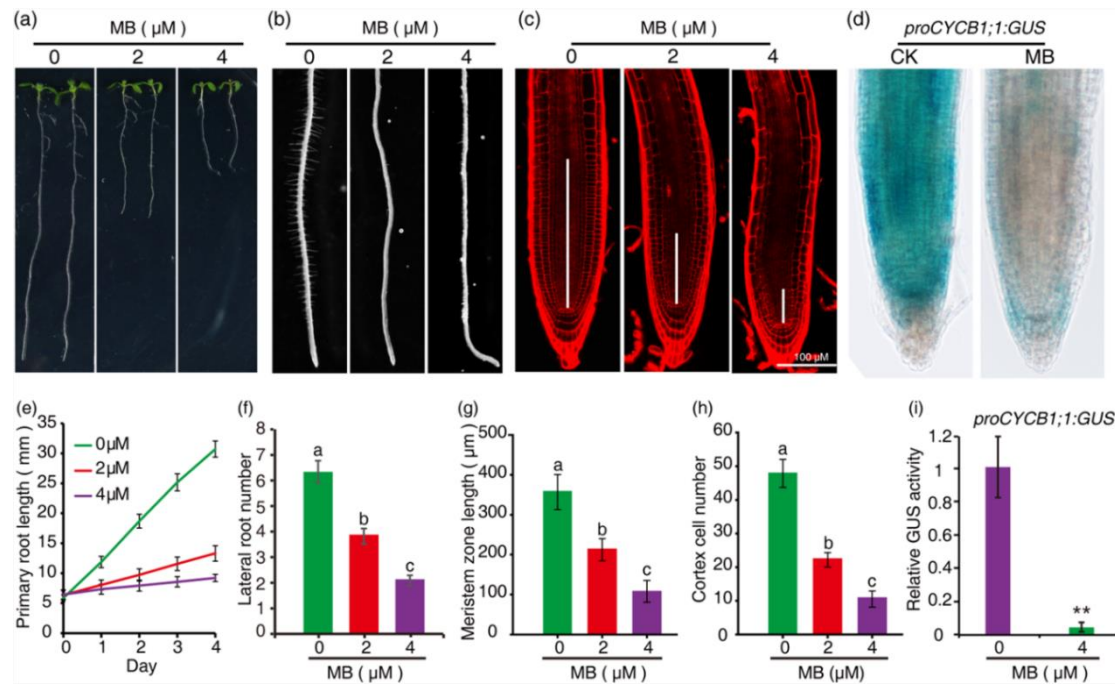

706

707 **Figure 6.** MB-mediated inhibition of Arabidopsis root development. (a) Phenotypes of  
708 wild-type Arabidopsis ecotype Columbia WT(Ar) seedlings treated with various  
709 concentration of MB. (b) Root morphology of seedlings described in (a). (c) Root  
710 meristem of seedlings described in (a). (d) Histochemical analysis of GUS activity in  
711 roots of *proCYCB1;1:GUS* plants in response to 4 μM MB. Statistical analyses of  
712 primary root length (e), lateral root number (f), root meristem zone length (g) and root  
713 cortical cell numbers (h) of seedlings described in (a). (i) Statistical analysis of GUS  
714 activity in roots shown in (d). For quantitative analyses of the root phenotypes, values  
715 represent mean ± SD from at least 15 seedlings. For GUS activity analysis, at least 8  
716 seedlings were tested, and the values representing mean ± SD are shown relative to  
717 control values. Letters above bars indicate significant differences among treatments ( $P$   
718 < 0.05, Student–Newman–Keuls test). Asterisks indicate significant differences (\*\*,  $P$   
719 < 0.01; Student’s t-test).

720

721

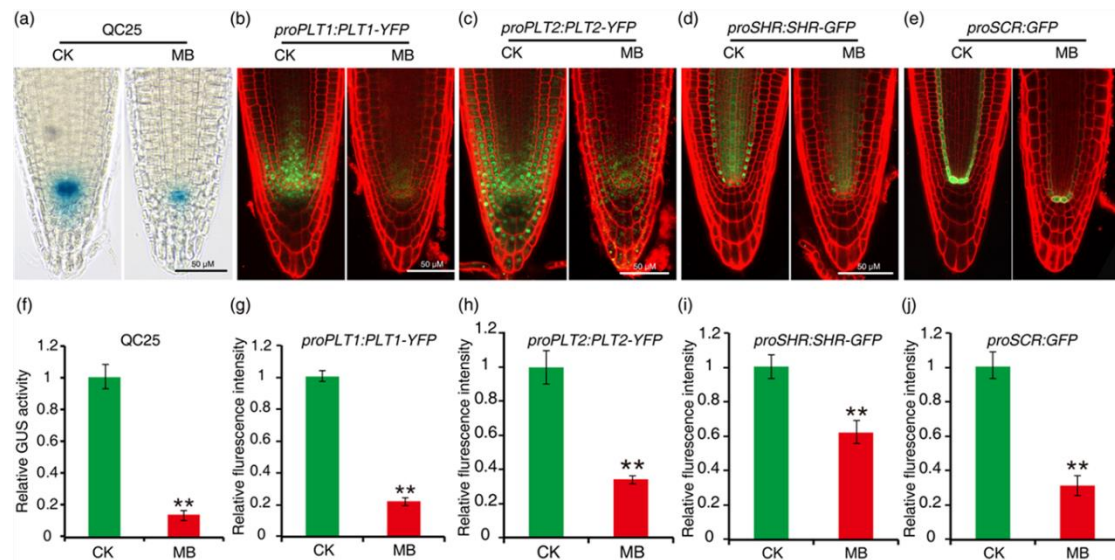

722

723 **Figure 7.** Momilactone B (MB) affects the expression of PLT1/ PLT2 and SCR/SHR  
724 in roots. (a) Histochemical analysis of GUS activity in Arabidopsis promoter trap line  
725 QC25 in response to 4  $\mu$ M MB. (b-e) Expression of *proPTL1:PTL1-YFP* (b),  
726 *proPTL2:PTL2-YFP* (c), *proSHR:SHR-GFP* (d) and *proSCR: GFP* (e) reporter genes  
727 in seedling roots grown for one day in the presence or absence of 4  $\mu$ M MB. (f)  
728 Quantification of GUS activity of roots described in (a). (g-j) Quantification of the  
729 fluorescence intensity of roots described in (b-e). Data represent mean  $\pm$  SD from at least  
730 eight seedlings. Values are shown relative to controls. Asterisks indicate significant  
731 differences (\*\*,  $P < 0.01$ ; Student's t-test).

732

733

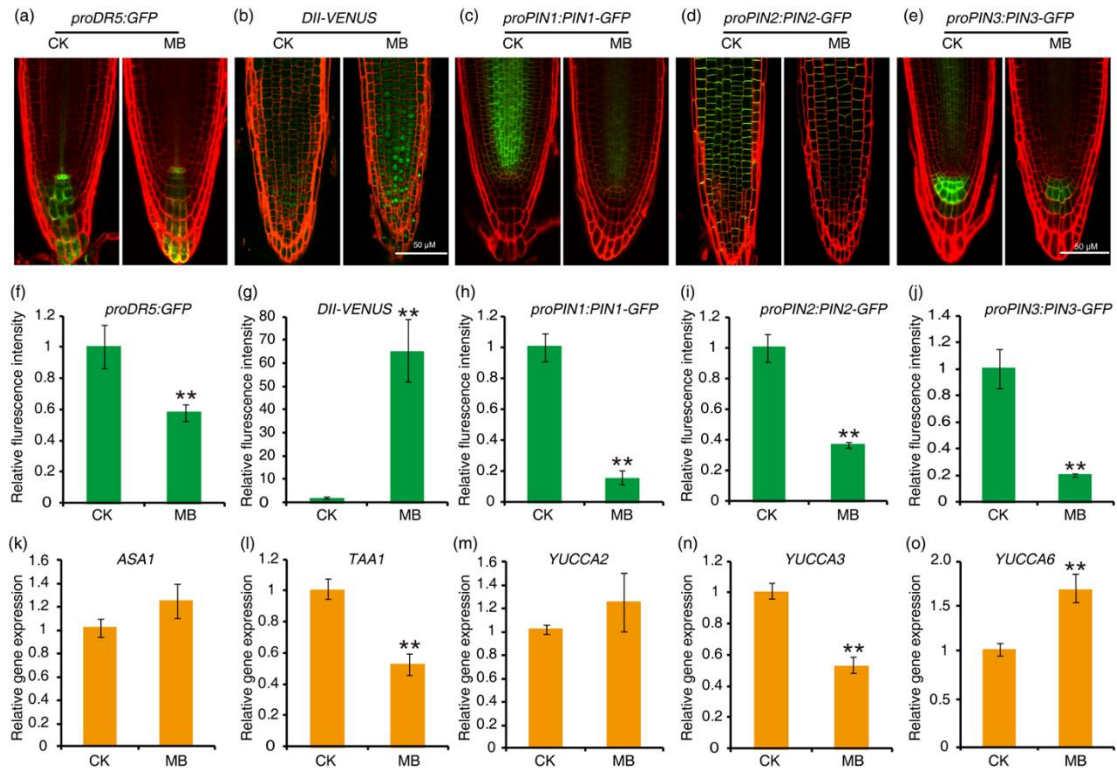

734

735 **Figure 8.** Effects of momilactone B (MB) on auxin pathway in Arabidopsis roots.

736 Expression of *proDR5:GFP* (a), *DII-VENUS* (b), *proPIN1:PIN1-GFP* (c),

737 *proPIN2:PIN2-GFP* (d), and *proPIN3:PIN3-GFP* (e) in root tips grown for 1 d in the

738 presence or absence of 4  $\mu$ M MB. (f-j) Quantification of fluorescence intensity in roots

739 described in (a-e). Relative transcript levels for selected auxin biosynthetic pathway

740 genes (k-o) in root tips in response to MB. For quantification of fluorescence intensity,

741 data represent mean  $\pm$  SD from at least eight seedlings. Values are shown relative to

742 controls. For qRT-PCR analyses, data represent mean  $\pm$  SD from three biological

743 replicates. Asterisks indicate significant differences (\*\*,  $P < 0.01$ ; Student's t-test).

744

745



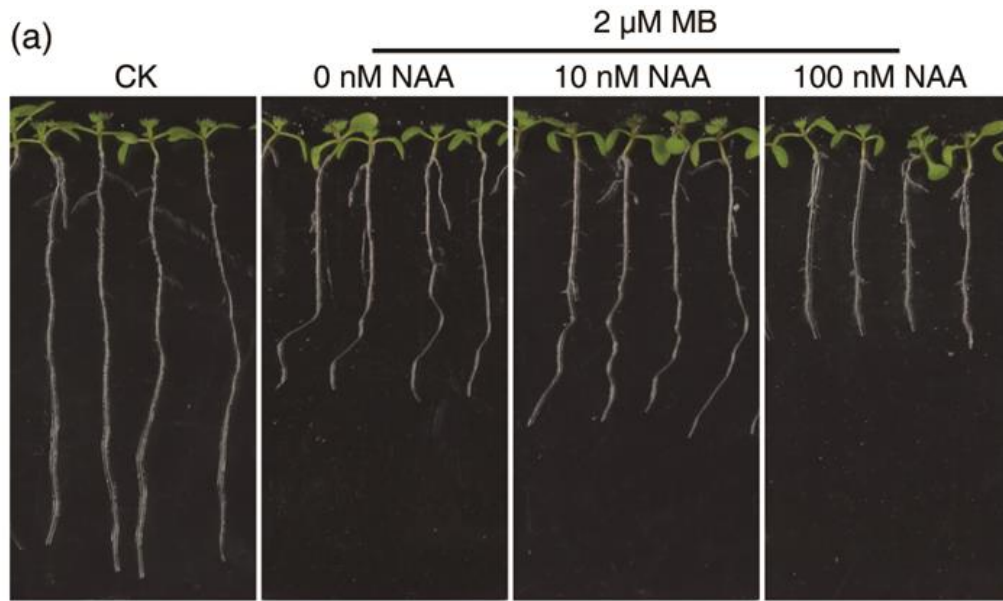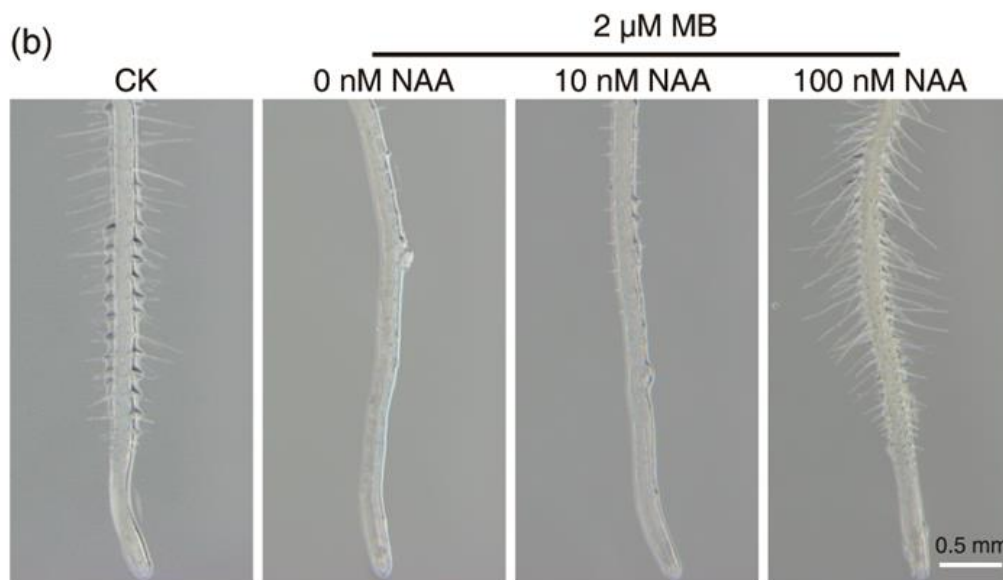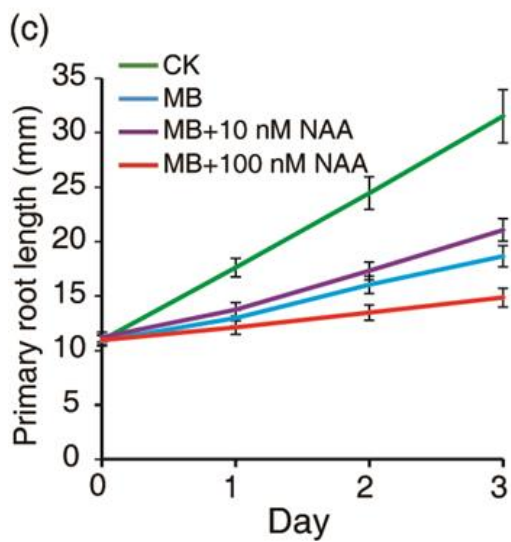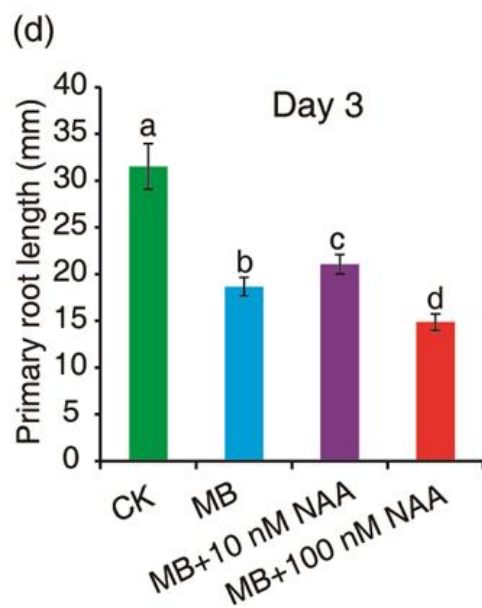

747 **Figure 9.** NAA partially rescues the inhibitory effects of momilactone B (MB) on root  
748 growth. (a) Phenotypes of wild-type *Arabidopsis* seedlings treated with various  
749 concentrations of NAA and 2  $\mu$ M MB for 3 days; (b) Phenotypes of the roots described  
750 in (a) at higher magnification; (c-d) Statistical analyses of the primary root lengths  
751 described in (a). Values represent mean  $\pm$  SD from at least 15 seedlings. Letters above  
752 bars indicate significant differences among treatments ( $P < 0.05$ , Student–Newman–  
753 Keuls test).  
754  
755  
756

757 **Literature Cited**

- 758 **Bais HP, Vepachedu R, Gilroy S, Callaway RM, Vivanco JM. 2003.** Allelopathy and exotic plant  
759 invasion: from molecules and genes to species interactions. *Science* **301**(5638): 1377-1380.
- 760 **Benkova E, Michniewicz M, Sauer M, Teichmann T, Seifertova D, Jurgens G, Friml J. 2003.** Local,  
761 efflux-dependent auxin gradients as a common module for plant organ formation. *Cell* **115**(5):  
762 591-602.
- 763 **Blilou I, Xu J, Wildwater M, Willemsen V, Paponov I, Friml J, Heidstra R, Aida M, Palme K,  
764 Scheres B. 2005.** The PIN auxin efflux facilitator network controls growth and patterning in  
765 Arabidopsis roots. *Nature* **433**(7021): 39-44.
- 766 **Brumos J, Robles LM, Yun J, Vu TC, Jackson S, Alonso JM, Stepanova AN. 2018.** Local Auxin  
767 Biosynthesis Is a Key Regulator of Plant Development. *Dev Cell* **47**(3): 306-318 e305.
- 768 **Brunoud G, Wells DM, Oliva M, Larrieu A, Mirabet V, Burrow AH, Beeckman T, Kepinski S,  
769 Traas J, Bennett MJ, et al. 2012.** A novel sensor to map auxin response and distribution at  
770 high spatio-temporal resolution. *Nature* **482**(7383): 103-106.
- 771 **Cederholm HM, Iyer-Pascuzzi AS, Benfey PN. 2012.** Patterning the primary root in Arabidopsis. *Wiley*  
772 *Interdisciplinary Reviews: Developmental Biology*: n/a-n/a.
- 773 **Chen BX, Peng YX, Gao JD, Zhang Q, Liu QJ, Fu H, Liu J. 2019.** Coumarin-Induced Delay of Rice  
774 Seed Germination Is Mediated by Suppression of Abscisic Acid Catabolism and Reactive  
775 Oxygen Species Production. *Front Plant Sci* **10**: 828.
- 776 **Colon-Carmona A, You R, Haimovitch-Gal T, Doerner P. 1999.** Technical advance: spatio-temporal  
777 analysis of mitotic activity with a labile cyclin-GUS fusion protein. *Plant J* **20**(4): 503-508.
- 778 **Dilday R, Lin J, Yan W. 1994.** Identification of allelopathy in the USDA-ARS rice germplasm collection.  
779 *Animal Production Science* **34**(7): 907-910.
- 780 **Dinneny JR, Benfey PN. 2008.** Plant stem cell niches: standing the test of time. *Cell* **132**(4): 553-557.
- 781 **Einhellig FA, Souza IF. 1992.** Phytotoxicity of sorgoleone found in grain Sorghum root exudates. *J*  
782 *Chem Ecol* **18**(1): 1-11.
- 783 **Fernandez-Marcos M, Sanz L, Lewis DR, Muday GK, Lorenzo O. 2011.** Nitric oxide causes root  
784 apical meristem defects and growth inhibition while reducing PIN-FORMED 1 (PIN1)-  
785 dependent acropetal auxin transport. *Proc Natl Acad Sci U S A* **108**(45): 18506-18511.
- 786 **Finkelstein R. 2013.** Abscisic Acid synthesis and response. *Arabidopsis Book* **11**: e0166.
- 787 **Friml J, Vieten A, Sauer M, Weijers D, Schwarz H, Hamann T, Offringa R, Jurgens G. 2003.** Efflux-  
788 dependent auxin gradients establish the apical-basal axis of Arabidopsis. *Nature* **426**(6963):  
789 147-153.
- 790 **Friml J, Wisniewska J, Benkova E, Mendgen K, Palme K. 2002.** Lateral relocation of auxin efflux  
791 regulator PIN3 mediates tropism in Arabidopsis. *Nature* **415**(6873): 806-809.
- 792 **Galinha C, Hofhuis H, Luijten M, Willemsen V, Blilou I, Heidstra R, Scheres B. 2007.** PLETHORA  
793 proteins as dose-dependent master regulators of Arabidopsis root development. *Nature*

- 794                   **449**(7165): 1053-1057.
- 795   **Grieneisen VA, Xu J, Maree AF, Hogeweg P, Scheres B. 2007.** Auxin transport is sufficient to generate  
796                   a maximum and gradient guiding root growth. *Nature* **449**(7165): 1008-1013.
- 797   **Hejli AM, Koster KL. 2004.** The allelochemical sorgoleone inhibits root H<sup>+</sup>-ATPase and water uptake.  
798                   *J Chem Ecol* **30**(11): 2181-2191.
- 799   **Hu Y, Han X, Yang M, Zhang M, Pan J, Yu D. 2019.** The Transcription Factor INDUCER OF CBF  
800                   EXPRESSION1 Interacts with ABSCISIC ACID INSENSITIVE5 and DELLA Proteins to  
801                   Fine-Tune Abscisic Acid Signaling during Seed Germination in Arabidopsis. *Plant Cell* **31**(7):  
802                   1520-1538.
- 803   **Inderjit, Wardle DA, Karban R, Callaway RM. 2011.** The ecosystem and evolutionary contexts of  
804                   allelopathy. *Trends Ecol Evol* **26**(12): 655-662.
- 805   **Jefferson RA, Kavanagh TA, Bevan MW. 1987.** GUS fusions: beta-glucuronidase as a sensitive and  
806                   versatile gene fusion marker in higher plants. *EMBO J* **6**(13): 3901-3907.
- 807   **Kato-Noguchi H, Hasegawa M, Ino T, Ota K, Kujime H. 2010.** Contribution of momilactone A and  
808                   B to rice allelopathy. *J Plant Physiol* **167**(10): 787-791.
- 809   **Kato-Noguchi H, Ino T, Sata N, Yamamura S. 2002.** Isolation and identification of a potent allelopathic  
810                   substance in rice root exudates. *Physiol Plant* **115**(3): 401-405.
- 811   **Kato-Noguchi H, Ota K, Kujime H. 2012.** Absorption of momilactone A and B by Arabidopsis thaliana  
812                   L. and the growth inhibitory effects. *J Plant Physiol* **169**(15): 1471-1476.
- 813   **Kato-Noguchi H, Peters RJ. 2013.** The role of momilactones in rice allelopathy. *J Chem Ecol* **39**(2):  
814                   175-185.
- 815   **Kato-Noguchi H, Ota K, Kujime H, Ogawa M. 2013.** Effects of momilactone on the protein expression  
816                   in Arabidopsis germination. *Weed Biology and Management* **13**(1): 19-23.
- 817   **Khanh TD, Xuan TD, Chung IM. 2007.** Rice allelopathy and the possibility for weed management.  
818                   *Annals of Applied Biology* **151**(3): 325-339.
- 819   **Kong C-H, Xuan TD, Khanh TD, Tran H-D, Trung NT. 2019.** Allelochemicals and Signaling  
820                   Chemicals in Plants. *Molecules* **24**(15): 2737.
- 821   **Lara-Nunez A, Sanchez-Nieto S, Luisa Anaya A, Cruz-Ortega R. 2009.** Phytotoxic effects of *Sicyos*  
822                   *depei* (Cucurbitaceae) in germinating tomato seeds. *Physiol Plant* **136**(2): 180-192.
- 823   **Lupini A, Araniti F, Sunseri F, Abenavoli MR. 2014.** Coumarin interacts with auxin polar transport to  
824                   modify root system architecture in Arabidopsis thaliana. *Plant growth regulation* **74**(1): 23-31.
- 825   **Macias FA, Marin D, Oliveros-Bastidas A, Castellano D, Simonet AM, Molinillo JM. 2005.**  
826                   Structure-Activity Relationships (SAR) studies of benzoxazinones, their degradation products  
827                   and analogues. phytotoxicity on standard target species (STS). *J Agric Food Chem* **53**(3): 538-  
828                   548.
- 829   **Macias FA, Molinillo JM, Varela RM, Galindo JC. 2007.** Allelopathy--a natural alternative for weed  
830                   control. *Pest Manag Sci* **63**(4): 327-348.
- 831   **Mashiguchi K, Tanaka K, Sakai T, Sugawara S, Kawaide H, Natsume M, Hanada A, Yaeno T,**

- 832           **Shirasu K, Yao H, et al. 2011.** The main auxin biosynthesis pathway in Arabidopsis. *Proc Natl*  
833           *Acad Sci U S A* **108**(45): 18512-18517.
- 834   **Middleton AM, Ubeda-Tomas S, Griffiths J, Holman T, Hedden P, Thomas SG, Phillips AL,**  
835           **Holdsworth MJ, Bennett MJ, King JR, et al. 2012.** Mathematical modeling elucidates the  
836           role of transcriptional feedback in gibberellin signaling. *Proc Natl Acad Sci U S A* **109**(19):  
837           7571-7576.
- 838   **Nakajima K, Sena G, Nawy T, Benfey PN. 2001.** Intercellular movement of the putative transcription  
839           factor SHR in root patterning. *Nature* **413**(6853): 307-311.
- 840   **Nakashima K, Fujita Y, Katsura K, Maruyama K, Narusaka Y, Seki M, Shinozaki K, Yamaguchi-**  
841           **Shinozaki K. 2006.** Transcriptional regulation of ABI3- and ABA-responsive genes including  
842           RD29B and RD29A in seeds, germinating embryos, and seedlings of Arabidopsis. *Plant Mol*  
843           *Biol* **60**(1): 51-68.
- 844   **Neve P, Vila-Aiub M, Roux F. 2009.** Evolutionary-thinking in agricultural weed management. *New*  
845           *Phytol* **184**(4): 783-793.
- 846   **Oracz K, Voegelé A, Tarkowska D, Jacquemoud D, Tureckova V, Urbanova T, Strnad M, Sliwinska**  
847           **E, Leubner-Metzger G. 2012.** Myriganone A inhibits *Lepidium sativum* seed germination by  
848           interference with gibberellin metabolism and apoplastic superoxide production required for  
849           embryo extension growth and endosperm rupture. *Plant Cell Physiol* **53**(1): 81-95.
- 850   **Petricka JJ, Winter CM, Benfey PN. 2012.** Control of Arabidopsis root development. *Annu Rev Plant*  
851           *Biol* **63**: 563-590.
- 852   **Sabatini S, Heidstra R, Wildwater M, Scheres B. 2003.** SCARECROW is involved in positioning the  
853           stem cell niche in the Arabidopsis root meristem. *Genes Dev* **17**(3): 354-358.
- 854   **Seal AN, Haig T, Pratley JE. 2004a.** Evaluation of putative allelochemicals in rice root exudates for  
855           their role in the suppression of arrowhead root growth. *J Chem Ecol* **30**(8): 1663-1678.
- 856   **Seal AN, Pratley JE, Haig T, An M. 2004b.** Identification and quantitation of compounds in a series of  
857           allelopathic and non-allelopathic rice root exudates. *J Chem Ecol* **30**(8): 1647-1662.
- 858   **Shu K, Liu XD, Xie Q, He ZH. 2016.** Two Faces of One Seed: Hormonal Regulation of Dormancy and  
859           Germination. *Mol Plant* **9**(1): 34-45.
- 860   **Shu K, Zhang H, Wang S, Chen M, Wu Y, Tang S, Liu C, Feng Y, Cao X, Xie Q. 2013.** ABI4 regulates  
861           primary seed dormancy by regulating the biogenesis of abscisic acid and gibberellins in  
862           arabidopsis. *PLoS Genet* **9**(6): e1003577.
- 863   **Siddique A, Ismail B. 2013.** Rice ecosystem, allelopathy and environment—A review. *The Agriculturists*  
864           **11**(1): 112-121.
- 865   **Soltys D, Rudzinska-Langwald A, Gniazdowska A, Wisniewska A, Bogatek R. 2012.** Inhibition of  
866           tomato (*Solanum lycopersicum* L.) root growth by cyanamide is due to altered cell division,  
867           phytohormone balance and expansin gene expression. *Planta* **236**(5): 1629-1638.
- 868   **Sun TP. 2008.** Gibberellin metabolism, perception and signaling pathways in Arabidopsis. *Arabidopsis*  
869           *Book 6*: e0103.

- 870 **Toki S, Hara N, Ono K, Onodera H, Tagiri A, Oka S, Tanaka H. 2006.** Early infection of scutellum  
871 tissue with *Agrobacterium* allows high-speed transformation of rice. *Plant J* **47**(6): 969-976.
- 872 **Tuan PA, Kumar R, Rehal PK, Toora PK, Ayele BT. 2018.** Molecular Mechanisms Underlying  
873 Abscisic Acid/Gibberellin Balance in the Control of Seed Dormancy and Germination in  
874 Cereals. *Front Plant Sci* **9**: 668.
- 875 **Venturelli S, Belz RG, Kamper A, Berger A, von Horn K, Wegner A, Bocker A, Zabulon G,**  
876 **Langenecker T, Kohlbacher O, et al. 2015.** Plants Release Precursors of Histone Deacetylase  
877 Inhibitors to Suppress Growth of Competitors. *Plant Cell* **27**(11): 3175-3189.
- 878 **Wu JX, Li J, Liu Z, Yin J, Chang ZY, Rong C, Wu JL, Bi FC, Yao N. 2015a.** The Arabidopsis  
879 ceramidase AtACER functions in disease resistance and salt tolerance. *Plant J* **81**(5): 767-780.
- 880 **Wu JX, Wu JL, Yin J, Zheng P, Yao N. 2015b.** Ethylene Modulates Sphingolipid Synthesis in  
881 Arabidopsis. *Front Plant Sci* **6**: 1122.
- 882 **Wysocka-Diller JW, Helariutta Y, Fukaki H, Malamy JE, Benfey PN. 2000.** Molecular analysis of  
883 SCARECROW function reveals a radial patterning mechanism common to root and shoot.  
884 *Development* **127**(3): 595-603.
- 885 **Xie X, Ma X, Zhu Q, Zeng D, Li G, Liu YG. 2017.** CRISPR-GE: A Convenient Software Toolkit for  
886 CRISPR-Based Genome Editing. *Mol Plant* **10**(9): 1246-1249.
- 887 **Xu M, Galhano R, Wiemann P, Bueno E, Tiernan M, Wu W, Chung IM, Gershenzon J, Tudzynski**  
888 **B, Sesma A, et al. 2012.** Genetic evidence for natural product-mediated plant-plant allelopathy  
889 in rice (*Oryza sativa*). *New Phytol* **193**(3): 570-575.
- 890 **Zadnikova P, Petrasek J, Marhavy P, Raz V, Vandenbussche F, Ding Z, Schwarzerova K, Morita**  
891 **MT, Tasaka M, Hejatko J, et al. 2010.** Role of PIN-mediated auxin efflux in apical hook  
892 development of *Arabidopsis thaliana*. *Development* **137**(4): 607-617.
- 893 **Zhang W, Lu LY, Hu LY, Cao W, Sun K, Sun QB, Siddikee A, Shi RH, Dai CC. 2018.** Evidence for  
894 the Involvement of Auxin, Ethylene and ROS Signaling During Primary Root Inhibition of  
895 Arabidopsis by the Allelochemical Benzoic Acid. *Plant Cell Physiol* **59**(9): 1889-1904.
- 896 **Zhao Y. 2014.** Auxin biosynthesis. *Arabidopsis Book* **12**: e0173.
- 897 **Zheng P, Wu JX, Sahu SK, Zeng HY, Huang LQ, Liu Z, Xiao S, Yao N. 2018.** Loss of alkaline  
898 ceramidase inhibits autophagy in Arabidopsis and plays an important role during environmental  
899 stress response. *Plant, cell & environment* **41**(4): 837-849.
- 900
- 901

902

903 **Supplemental Data**

904 **Figure S1.** Generation of momilactone biosynthesis deficient mutant *oscps4* using  
905 CRISPR-Cas9. (a) Sequence analysis of the mutated site within the generated *oscps4*  
906 knockout line. (b) Phenotypes and (c) length of roots and hypocotyls of lettuce plants  
907 co-cultured with wild-type and *oscps4* mutant plants for 6 days. Data represent mean  $\pm$   
908 SD from 100 seedlings (\*\*,  $P < 0.01$ ; Student's t-test).

909

910 **Figure S2.** Momilactone B (MB) reduces PIN1 protein level in a proteasome pathway  
911 and NO-independent manner. Distribution of *pro:PIN1:PIN1-GFP* protein in  
912 Arabidopsis seedlings treated with 4  $\mu$ M MB for 0 to 24 h (a), and in seedlings treated  
913 with proteasome inhibitor MG132 (100  $\mu$ M) or NO scavenger cPTIO (1 mM), with or  
914 without 4  $\mu$ M MB for 24 h (b).

915

916 **Table S1.** Primers used in this study.

917
